# Supplementary material for: Current status and influencing factors of digital competence among nurses in intensive care units: a cross-sectional study
Source: Research Square preprint supplement (doi:10.21203/rs.3.rs-7851326/v1), 2025-11-07
Supplement: Supplementary file 1 [file b09ab5e2c2cf07a907f13b11.docx]

**Supplementary Table 1.** The general demographic characteristics questionnaire

Basic Information (Please mark with “√”)

1.Your Gender:

🞎 Male 🞎 Female

2.Your Age(years):

🞎 ＜25 years 🞎 25-35 years 🞎 36-45 years 🞎 ≥45 years

3. Your Marital status:

🞎 Married 🞎 Unmarried 🞎 Widowed/divorced

4.Your Educational level:

🞎 Secondary and tertiary education 🞎 Undergraduate education

🞎 Graduate and above

5. Professional title:

🞎 Primary nurse 🞎 Nurse practitioner 🞎 Nurse-in‐charge and above

6. Working years:

🞎 0-5 years 🞎 6-10 years 🞎 ＞10 years

7. Job Position:

🞎 Clinical Nurse 🞎 Nursing administrator 🞎 Nursing Team Leader

🞎 Others

8. Hospital level (tier):

🞎 Tertiary hospital 🞎 Secondary hospitals

9. ICU type

🞎Specialized ICU 🞎Comprehensive ICU

10. Receive relevant digital technology training:

🞎 Yes 🞎 No

**Supplementary Table 2.** The Digital Competence Questionnaire (DCQ)

| **No** | **Item** | **Option** | | | | |
| --- | --- | --- | --- | --- | --- | --- |
| 1 | Digital technology fits well with the way I like to work. | Strongly Disagree | Disagree | Neutral | Agree | Strongly Agree |
| 2 | I enjoy using digital technology at my workplace. | Strongly Disagree | Disagree | Neutral | Agree | Strongly Agree |
| 3 | I like to use digital technology at work. | Strongly Disagree | Disagree | Neutral | Agree | Strongly Agree |
| 4 | I believe that digital technology provides numerous benefits in terms of quality of care. | Strongly Disagree | Disagree | Neutral | Agree | Strongly Agree |
| 5 | I believe that digital technology improves patient outcomes. | Strongly Disagree | Disagree | Neutral | Agree | Strongly Agree |
| 6 | I believe that digital technology is beneficial for my patients. | Strongly Disagree | Disagree | Neutral | Agree | Strongly Agree |
| 7 | I am familiar with the digital technologies at my workplace. | Strongly Disagree | Disagree | Neutral | Agree | Strongly Agree |
| 8 | I feel confident about using digital technology to find relevant information. | Strongly Disagree | Disagree | Neutral | Agree | Strongly Agree |
| 9 | I feel confident about using digital technology to communicate. | Strongly Disagree | Disagree | Neutral | Agree | Strongly Agree |
| 10 | I feel confident about using digital technology to obtain data and information on clinical care. | Strongly Disagree | Disagree | Neutral | Agree | Strongly Agree |
| 11 | I am able to reach conclusions based on information acquired through digital technologies. | Strongly Disagree | Disagree | Neutral | Agree | Strongly Agree |
| 12 | I feel confident in dealing with confidentiality issues relating to digital technology at my workplace. | Strongly Disagree | Disagree | Neutral | Agree | Strongly Agree |

**Supplementary Table 3.** The Creative Self-Efficacy Questionnaire

| **No** | **Item** | **Option** | | | | |
| --- | --- | --- | --- | --- | --- | --- |
| 1 | I can use innovative work methods to achieve most of the goals I set. | Strongly Disagree | Disagree | Neutral | Agree | Strongly Agree |
| 2 | Facing difficult tasks, I am quite sure that I can complete them creatively. | Strongly Disagree | Disagree | Neutral | Agree | Strongly Agree |
| 3 | Generally speaking, I think I can obtain important achievements with innovative methods. | Strongly Disagree | Disagree | Neutral | Agree | Strongly Agree |
| 4 | Most of the time, I can turn innovative ideas into reality. | Strongly Disagree | Disagree | Neutral | Agree | Strongly Agree |
| 5 | I can deal with various challenges creatively. | Strongly Disagree | Disagree | Neutral | Agree | Strongly Agree |
| 6 | I am confident in completing various different work tasks creatively. | Strongly Disagree | Disagree | Neutral | Agree | Strongly Agree |
| 7 | Compared with others, I am full of creativity in work. | Strongly Disagree | Disagree | Neutral | Agree | Strongly Agree |
| 8 | Even if things are very difficult, I can still do them well creatively. | Strongly Disagree | Disagree | Neutral | Agree | Strongly Agree |

**Supplementary Table 4.** The Perceived Organizational Support Scale

| **No** | **Item** | **Option** | | | | |
| --- | --- | --- | --- | --- | --- | --- |
| 1 | The hospital values my contributions. | Strongly Disagree | Disagree | Neutral | Agree | Strongly Agree |
| 2 | The hospital cares about my welfare. | Strongly Disagree | Disagree | Neutral | Agree | Strongly Agree |
| 3 | The hospital can actively listen to my opinions. | Strongly Disagree | Disagree | Neutral | Agree | Strongly Agree |
| 4 | When I encounter difficulties at work, the hospital will try its best to help me. | Strongly Disagree | Disagree | Neutral | Agree | Strongly Agree |
| 5 | When I encounter difficulties in life, the hospital will try its best to help me. | Strongly Disagree | Disagree | Neutral | Agree | Strongly Agree |
| 6 | The hospital will give me opportunities for promotion. | Strongly Disagree | Disagree | Neutral | Agree | Strongly Agree |
| 7 | The hospital will respect my goals and values. | Strongly Disagree | Disagree | Neutral | Agree | Strongly Agree |
| 8 | The hospital cares about my personal development. | Strongly Disagree | Disagree | Neutral | Agree | Strongly Agree |
| 9 | The hospital cares about my health. | Strongly Disagree | Disagree | Neutral | Agree | Strongly Agree |
| 10 | The hospital will try its best to solve the worries of my life and family for me. | Strongly Disagree | Disagree | Neutral | Agree | Strongly Agree |
| 11 | The hospital will try its best to provide me with a good working environment. | Strongly Disagree | Disagree | Neutral | Agree | Strongly Agree |
| 12 | The hospital will try its best to provide me with the tools and information needed for work. | Strongly Disagree | Disagree | Neutral | Agree | Strongly Agree |
| 13 | The hospital will try its best to provide me with relevant training needed for work. | Strongly Disagree | Disagree | Neutral | Agree | Strongly Agree |
