# Supplementary material for: Current status and influencing factors of digital competence among nurses in intensive care units: a cross-sectional study
Source: Research Square preprint supplement (doi:10.21203/rs.3.rs-7851326/v1), 2025-11-07
Supplement: Supplementary file 2 [file eaf35c8c97c887276ab3cd88.xlsx]

## Sheet: Sheet1
Number	Your Gender	Your Age(years)	Your Marital status	Your Educational level	Professional title	Working years:	ICU type	Job Position	Hospital level	Receive relevant digital technology training:	Q1	Q2	Q3	Q4	Q5	Q6	Q7	Q8	Q9	Q10	Q11	Q12	Q	a1	a2	a3	a4	a5	a6	a7	a8	a	b1	b2	b3	b4	b5	b6	b7	b8	b9	b10	b11	b12	b13	b
1	2	2	2	2	1	1	2	1	1	1	5	5	5	5	5	5	5	4	5	5	3	5	57	5	5	5	4	5	5	5	4	38	4	4	4	4	4	5	5	4	5	5	5	4	5	58
2	1	2	1	2	2	3	2	1	1	2	2	2	2	2	4	2	2	2	3	3	3	3	30	3	5	3	3	4	3	3	5	29	3	4	5	4	5	4	5	4	5	5	5	5	5	59
3	2	3	1	2	2	3	1	3	1	1	5	5	5	5	5	5	5	5	5	5	5	5	60	5	5	4	5	5	5	5	5	39	3	4	5	4	5	5	4	5	5	5	5	5	4	59
4	1	1	2	2	1	1	1	1	1	2	5	5	5	5	5	5	5	5	5	5	5	5	60	5	5	5	5	5	5	5	5	40	5	4	4	5	4	5	4	4	4	4	4	4	4	55
5	2	3	1	2	2	3	1	2	1	1	3	3	2	3	3	3	3	3	3	3	3	3	35	3	3	3	3	3	3	3	3	24	5	5	5	5	4	5	4	5	5	4	4	4	4	59
6	1	3	1	2	2	3	2	3	2	1	5	5	5	5	5	5	5	5	5	5	5	5	60	4	4	5	4	5	5	5	4	37	5	4	5	5	4	4	4	5	4	4	4	4	4	56
7	2	3	1	2	2	3	1	2	1	1	5	5	5	5	5	5	5	5	5	4	4	4	57	3	5	5	5	5	5	5	5	38	4	5	5	5	5	4	4	5	5	5	4	5	4	60
8	2	2	2	2	1	1	1	1	1	2	4	4	4	4	4	4	4	4	4	4	4	4	48	4	4	4	4	4	4	4	4	32	5	5	5	4	5	5	5	5	5	5	5	5	5	64
9	2	3	1	2	2	3	1	2	1	1	3	4	4	4	3	4	4	4	4	5	3	4	46	3	4	4	3	4	3	3	3	27	4	5	5	5	5	5	5	5	5	5	5	5	5	64
10	2	1	2	2	1	1	2	1	1	1	4	4	3	3	3	3	3	3	2	2	3	3	36	2	3	5	3	5	5	3	3	29	3	5	5	5	5	5	5	5	5	4	5	5	5	62
11	2	3	1	2	2	3	2	1	1	2	4	4	4	4	4	4	4	4	4	4	4	4	48	5	3	5	5	5	3	3	3	32	3	5	5	5	5	5	5	5	5	5	5	5	5	63
12	2	2	2	3	1	1	1	1	1	2	4	4	4	4	5	4	4	3	3	5	4	4	48	4	3	4	3	3	5	3	4	29	4	5	4	5	5	4	4	5	4	4	4	5	4	57
13	1	2	1	2	2	3	1	1	1	1	3	5	5	5	3	5	3	4	5	3	5	3	49	4	3	3	3	3	3	3	3	25	4	5	5	5	5	4	5	5	5	5	4	5	5	62
14	2	1	2	2	1	1	2	1	1	1	5	5	5	5	5	5	5	5	5	5	5	5	60	5	5	5	5	5	4	5	5	39	3	5	5	4	5	4	5	5	5	5	4	5	5	60
15	2	1	2	2	1	1	2	1	1	1	4	4	4	5	4	4	4	4	4	4	4	4	49	4	4	4	4	4	5	4	4	33	3	5	5	5	5	4	4	4	5	5	4	5	4	58
16	2	3	1	2	2	3	1	3	1	2	4	5	5	5	4	4	2	4	4	4	4	4	49	3	4	4	5	3	5	3	4	31	3	5	4	5	4	4	5	4	5	4	5	4	5	57
17	1	1	2	2	1	1	2	4	1	2	4	4	4	4	4	4	4	4	5	5	4	4	50	4	4	4	4	4	4	4	4	32	3	5	5	5	5	4	4	5	4	4	4	5	4	57
18	1	2	1	2	1	2	2	1	1	2	4	4	4	4	4	4	4	4	4	4	4	4	48	3	4	4	3	3	3	4	4	28	3	5	5	5	5	4	5	5	5	5	4	5	5	61
19	2	2	1	2	2	2	1	1	1	1	5	5	5	5	5	5	5	5	5	5	5	5	60	5	5	5	4	4	4	4	4	35	3	4	4	5	5	4	4	4	4	4	4	5	4	54
20	2	3	1	2	2	3	2	2	1	2	5	5	5	5	5	5	3	3	5	5	5	5	56	3	5	3	3	3	3	4	3	27	4	5	5	4	5	4	4	4	5	4	4	5	4	57
21	2	3	1	2	2	3	1	3	1	1	4	4	4	4	4	4	3	4	4	4	4	4	47	3	4	4	4	3	5	4	4	31	3	5	5	4	5	4	5	5	5	5	4	5	5	60
22	1	1	2	2	1	1	2	1	1	2	4	4	3	4	4	5	4	4	4	4	3	4	47	3	4	4	2	3	4	3	3	26	3	5	5	4	5	5	5	5	5	5	4	5	5	61
23	2	2	2	3	1	1	2	1	1	2	4	4	4	5	5	4	4	4	4	5	4	4	51	4	3	3	2	3	4	3	2	24	4	4	4	5	5	4	4	5	5	4	4	5	4	57
24	2	2	1	2	2	3	2	3	1	1	5	4	4	4	4	4	3	4	4	4	4	4	48	3	4	3	2	4	3	4	3	26	4	4	5	4	4	5	4	5	4	5	5	4	4	57
25	2	2	2	2	1	1	2	1	1	1	4	4	4	4	4	4	4	4	4	4	4	4	48	4	4	4	4	4	4	4	4	32	3	5	5	5	5	5	5	5	5	5	5	5	5	63
26	2	3	1	2	2	3	2	2	1	2	5	3	3	3	3	3	3	3	3	3	3	3	38	3	4	3	3	3	4	3	3	26	4	4	4	5	5	4	4	4	5	5	4	5	4	57
27	1	2	1	2	1	2	2	1	1	1	5	5	5	5	5	5	5	5	5	5	5	5	60	5	5	5	5	5	5	5	5	40	4	4	4	4	4	4	4	4	4	4	4	4	4	52
28	2	4	1	2	2	3	2	1	1	1	4	5	5	5	4	5	5	5	4	4	4	4	54	3	4	4	2	2	2	4	2	23	3	5	5	5	5	4	5	5	4	5	5	5	5	61
29	2	3	1	2	3	3	2	1	1	2	4	4	4	4	4	4	4	4	4	4	4	4	48	3	3	4	3	4	3	3	4	27	3	4	5	5	5	4	5	4	5	5	5	5	5	60
30	2	1	2	2	1	1	1	1	1	1	4	5	4	4	4	4	4	4	4	4	4	4	49	4	4	4	4	3	4	4	4	31	3	5	5	5	5	4	4	5	5	5	5	5	4	60
31	1	2	1	2	2	2	1	3	1	1	4	4	4	4	5	4	3	3	4	4	4	5	48	4	4	4	2	4	3	4	4	29	3	5	5	5	4	5	4	5	5	4	4	4	4	57
32	2	3	1	2	2	3	2	3	1	2	4	4	4	4	4	4	4	4	4	4	4	4	48	4	4	4	4	4	4	4	4	32	3	5	5	4	5	4	5	5	5	5	5	5	5	61
33	2	3	1	2	2	3	1	2	1	2	3	4	4	4	4	4	4	4	4	4	4	3	46	3	4	3	5	4	4	4	4	31	4	5	5	4	5	4	4	5	4	4	4	5	4	57
34	2	2	1	3	2	3	1	2	1	2	3	3	3	4	4	5	4	4	4	4	4	4	46	4	4	4	4	5	4	4	4	33	3	5	5	5	5	4	4	5	4	5	4	5	4	58
35	2	2	1	2	2	2	2	1	1	2	4	4	4	4	4	4	4	4	4	4	4	4	48	4	4	4	4	4	4	4	4	32	3	5	5	5	5	5	5	5	5	5	5	5	5	63
36	2	3	1	3	3	3	1	3	1	1	4	4	4	4	3	3	3	3	4	4	4	4	44	3	4	4	3	5	4	4	4	31	4	4	4	4	4	4	4	4	4	4	4	4	4	52
37	1	3	1	2	2	3	2	2	1	1	4	4	4	4	4	4	4	4	4	3	4	4	47	5	4	4	4	4	4	4	3	32	4	5	5	4	5	5	4	5	5	5	5	5	4	61
38	2	4	1	2	3	3	1	3	1	1	5	5	5	5	5	5	5	5	5	5	5	5	60	5	4	4	5	4	5	5	4	36	4	5	5	5	5	4	4	5	5	5	4	5	4	60
39	2	2	1	2	2	3	1	1	1	1	4	4	4	4	4	4	4	4	4	4	4	4	48	4	3	4	4	3	5	3	3	29	3	4	5	4	5	5	4	5	5	4	5	5	4	58
40	2	4	1	2	2	3	2	1	1	2	3	3	3	4	4	4	3	3	3	3	3	3	39	3	3	3	2	2	4	3	3	23	4	4	4	5	4	4	4	4	4	4	4	4	4	53
41	2	3	1	2	2	3	1	3	2	1	5	5	5	5	5	5	5	4	4	4	4	4	55	5	5	5	5	5	5	4	4	38	3	5	5	4	5	4	5	5	5	5	4	5	5	60
42	2	3	1	2	3	3	2	3	1	2	4	4	4	4	4	4	4	4	4	4	4	4	48	4	4	4	2	3	2	2	2	23	3	5	5	5	5	5	5	5	5	5	5	5	5	63
43	2	3	1	2	2	3	2	2	1	1	4	5	4	4	4	4	4	4	4	4	4	4	49	4	4	4	1	4	3	3	3	27	4	5	5	5	5	4	4	4	5	5	4	5	4	59
44	1	1	2	2	1	1	1	1	1	2	3	3	3	3	3	3	4	4	4	4	4	4	42	4	3	3	2	3	3	3	3	24	4	4	4	5	4	4	4	4	4	5	4	4	4	54
45	2	2	1	2	1	2	1	1	1	1	4	4	4	5	4	4	4	4	4	4	4	4	49	3	3	3	3	3	4	3	3	25	3	5	5	5	5	4	4	4	5	4	4	5	4	57
46	1	3	1	2	2	3	1	2	1	1	5	5	5	5	4	5	5	5	4	5	5	5	58	5	5	5	5	5	5	4	4	38	4	4	4	5	5	4	5	4	5	5	5	5	5	60
47	2	3	1	2	2	3	1	2	1	2	4	4	4	4	4	4	4	4	4	4	4	4	48	4	4	4	2	2	4	4	4	28	3	5	5	5	5	4	5	5	5	5	4	5	5	61
48	2	3	1	2	3	3	2	3	1	1	5	5	5	5	5	5	5	5	5	5	5	5	60	4	5	5	5	5	5	5	5	39	4	5	5	5	5	4	5	5	5	5	5	5	5	63
49	2	3	1	2	3	3	1	3	1	1	4	4	4	4	4	4	3	4	4	4	4	3	46	3	4	3	3	3	3	3	3	25	4	4	4	5	5	4	4	5	5	5	4	5	4	58
50	2	3	1	2	2	2	2	2	1	1	5	4	5	5	5	5	4	4	4	4	4	4	53	5	3	3	5	5	5	5	5	36	3	5	5	5	5	5	5	5	5	5	5	5	5	63
51	2	3	1	2	2	3	2	2	1	1	4	4	4	5	5	5	4	5	5	5	5	5	56	4	4	5	5	4	5	5	5	37	3	5	5	4	5	5	5	5	5	5	4	5	5	61
52	2	3	1	2	2	3	2	1	1	2	3	5	3	5	3	5	5	5	4	3	5	5	51	3	5	5	5	5	5	5	3	36	3	5	5	4	5	5	4	5	5	5	5	5	4	60
53	2	3	1	2	2	3	2	1	1	1	5	5	5	5	5	5	5	5	5	5	5	5	60	5	5	5	5	5	5	5	5	40	4	5	4	5	4	4	4	4	4	5	4	4	4	55
54	2	2	2	2	1	2	2	4	1	2	4	4	4	4	4	4	3	3	3	4	4	3	44	2	3	5	5	5	5	5	5	35	4	5	5	4	5	5	5	4	4	5	5	5	5	61
55	2	2	1	2	2	2	2	1	1	1	5	5	5	5	5	5	5	5	5	5	5	5	60	5	5	3	5	5	5	5	5	38	3	5	4	5	4	4	5	5	5	5	5	4	5	59
56	1	3	1	2	2	3	2	1	1	2	3	4	5	4	3	4	5	4	5	3	5	4	49	3	3	3	3	3	3	3	3	24	3	5	4	5	4	4	4	5	4	5	4	4	4	55
57	2	3	1	1	2	3	2	1	2	1	5	5	5	5	5	5	5	5	5	5	5	5	60	5	5	5	5	5	5	3	4	37	4	5	4	5	4	5	4	5	4	5	5	4	4	58
58	2	2	1	2	2	3	2	2	1	2	4	4	4	4	4	4	4	4	4	4	4	4	48	2	2	3	4	2	1	3	1	18	3	4	4	5	5	4	4	4	4	4	4	5	4	54
59	2	2	2	3	1	1	1	1	1	2	4	4	4	5	4	4	4	3	3	3	4	4	46	3	4	3	4	3	4	3	3	27	4	4	4	5	5	5	5	4	5	4	4	5	5	59
60	2	3	1	2	2	3	2	1	1	1	5	5	5	5	5	5	4	4	5	5	5	4	57	4	4	4	2	4	4	3	3	28	3	5	5	5	5	4	4	5	4	5	4	5	4	58
61	1	2	2	2	1	1	2	4	1	2	5	5	5	5	5	5	5	5	5	5	5	5	60	4	5	5	5	5	5	5	4	38	4	4	5	4	5	5	4	4	4	5	4	5	4	57
62	2	3	1	2	2	3	1	1	1	1	4	4	4	4	4	4	4	4	4	4	4	4	48	5	5	5	5	3	3	5	3	34	4	5	4	5	5	4	4	4	4	4	4	5	4	56
63	1	2	1	2	2	2	2	4	1	2	4	4	4	5	5	5	5	3	4	5	3	4	51	3	3	3	4	4	5	5	5	32	4	5	5	5	5	5	4	5	4	5	5	5	4	61
64	2	1	2	3	1	1	2	1	1	1	4	4	4	4	4	4	4	4	4	4	4	4	48	4	4	4	4	4	4	4	4	32	4	4	4	5	5	5	4	4	5	4	4	5	4	57
65	2	3	1	2	3	3	1	1	1	1	4	4	4	4	3	3	4	4	4	4	4	4	46	4	3	3	3	3	3	3	3	25	4	5	5	4	5	5	5	5	4	5	4	5	5	61
66	2	2	2	2	1	2	2	1	1	1	4	4	4	4	4	4	4	4	4	4	4	4	48	3	4	4	2	3	3	4	2	25	4	4	4	5	5	5	5	5	5	5	4	5	5	61
67	2	3	1	2	2	3	2	4	1	1	4	4	4	4	4	4	4	4	3	4	3	4	46	3	3	3	3	3	3	3	3	24	4	5	5	5	5	4	5	5	5	5	5	5	5	63
68	2	3	1	2	2	3	2	3	1	1	4	4	4	4	5	5	5	5	5	5	4	3	53	4	4	3	3	3	4	4	4	29	4	4	4	5	5	4	4	5	5	4	4	5	4	57
69	2	3	1	2	3	3	2	3	1	1	5	5	5	5	3	5	4	5	5	5	5	5	57	5	5	5	5	5	5	5	5	40	3	4	5	5	4	4	4	4	4	4	4	4	4	53
70	1	1	2	2	1	1	2	1	1	1	5	5	5	5	5	5	5	5	5	5	5	4	59	4	4	5	4	3	4	4	4	32	3	4	4	5	4	4	4	4	4	4	4	4	4	52
71	1	3	1	2	2	3	1	1	1	2	3	4	4	4	4	5	4	4	4	4	4	4	48	4	4	4	3	4	4	3	3	29	3	4	5	5	4	4	4	4	4	4	4	4	4	53
72	1	2	1	2	1	1	1	1	1	1	4	4	4	4	4	4	4	4	4	4	4	4	48	4	4	4	2	3	3	4	2	26	4	5	5	5	5	5	5	5	5	5	5	5	5	64
73	2	2	1	3	2	2	2	1	1	2	4	5	5	5	5	5	4	5	5	5	5	5	58	5	5	5	5	5	5	5	5	40	4	4	4	5	5	4	4	4	4	4	5	5	4	56
74	2	2	1	2	2	3	1	3	1	1	4	4	4	5	4	4	4	4	4	4	4	4	49	4	4	4	4	4	4	5	4	33	4	5	5	4	5	4	4	5	4	4	4	5	4	57
75	1	2	1	2	1	1	2	2	1	1	4	5	5	5	4	5	4	4	4	4	4	4	52	4	4	4	2	2	3	3	2	24	4	5	4	5	5	4	4	5	5	5	4	5	4	59
76	2	3	1	2	2	3	1	2	1	1	4	4	4	5	4	4	4	5	4	4	3	4	49	3	3	3	2	4	2	3	2	22	4	5	4	5	5	4	4	5	4	5	4	5	4	58
77	2	2	2	3	1	1	2	1	1	2	4	4	4	4	4	4	3	5	5	5	4	3	49	5	4	4	2	3	4	3	2	27	3	5	5	4	5	5	5	5	5	5	5	5	5	62
78	2	2	1	2	1	2	2	1	1	2	4	4	4	4	3	4	4	4	4	5	4	3	47	4	3	4	2	3	1	4	1	22	4	5	4	5	5	5	5	5	4	4	5	5	5	61
79	2	2	2	3	1	1	2	1	1	2	4	5	4	4	4	5	4	4	4	5	5	5	53	4	4	4	4	3	4	3	4	30	3	5	5	5	5	5	5	5	5	5	5	5	5	63
80	1	1	2	2	1	1	2	1	1	1	4	4	5	4	5	4	4	4	5	4	5	4	52	4	4	5	3	3	4	4	3	30	4	5	5	4	5	5	4	4	4	4	4	5	4	57
81	2	2	1	2	1	2	1	1	1	1	3	4	4	4	4	4	4	3	3	3	4	3	43	3	4	3	2	3	2	3	3	23	3	5	5	5	5	5	5	4	5	5	4	5	5	61
82	2	2	2	3	1	1	2	1	1	1	5	5	5	5	5	4	5	4	4	5	4	5	56	4	4	3	2	5	3	4	4	29	3	5	5	5	5	4	4	5	5	5	5	5	4	60
83	2	1	2	2	1	1	2	1	1	1	5	5	5	5	5	5	5	5	5	5	5	5	60	5	5	5	5	5	5	5	5	40	4	4	4	5	5	4	4	4	4	5	4	5	4	56
84	2	2	1	2	1	2	2	1	1	2	4	4	4	4	4	4	4	4	4	4	4	4	48	3	4	4	3	3	3	4	3	27	4	4	4	5	5	4	5	5	5	5	5	5	5	61
85	2	3	1	2	2	3	1	2	1	1	4	4	4	4	4	3	4	4	4	4	4	4	47	4	4	4	3	3	4	4	3	29	3	5	5	5	5	4	5	5	5	5	4	5	5	61
86	2	1	2	2	1	1	2	1	1	1	5	5	5	5	5	5	5	5	5	5	5	5	60	5	5	5	5	5	5	5	5	40	3	5	5	5	5	5	5	5	5	5	5	5	5	63
87	2	2	1	2	2	2	2	1	1	1	4	4	4	5	4	4	4	3	3	3	3	5	46	3	4	2	2	2	4	3	4	24	4	5	4	4	5	5	4	5	5	5	5	5	4	60
88	2	2	2	2	1	1	2	1	1	1	4	4	4	5	4	4	4	4	3	4	4	4	48	3	2	3	2	2	2	2	2	18	4	5	5	4	4	4	5	5	4	5	4	4	5	58
89	2	2	1	2	2	3	2	1	1	1	3	4	4	4	3	3	3	2	4	4	3	3	40	2	3	3	3	3	3	3	3	23	3	5	5	5	5	5	5	5	4	5	5	5	5	62
90	2	2	2	3	1	1	2	1	1	2	5	4	5	5	4	4	3	4	4	4	4	4	50	4	3	3	2	4	3	3	3	25	4	5	5	5	5	4	4	5	5	5	5	5	4	61
91	1	2	2	3	1	1	2	1	1	1	5	5	4	4	4	5	5	4	5	5	4	5	55	4	4	5	5	4	4	5	4	35	3	5	5	5	5	5	5	5	5	5	4	5	5	62
92	1	2	1	2	2	3	2	2	1	2	4	4	4	4	3	4	4	4	4	4	4	4	47	3	4	3	2	2	3	3	3	23	4	5	5	5	5	4	5	5	5	5	5	5	5	63
93	2	3	1	2	2	3	2	3	2	1	5	5	5	5	4	5	5	5	5	5	5	4	58	4	5	4	5	4	4	5	3	34	4	5	5	4	5	4	5	5	5	5	4	5	5	61
94	2	3	1	2	2	3	2	2	1	2	5	5	5	5	3	5	5	5	5	5	5	5	58	2	2	2	5	2	5	3	1	22	4	4	4	4	4	4	4	4	5	4	4	4	4	53
95	2	3	1	2	1	3	2	1	1	1	4	4	4	4	4	4	4	3	4	4	4	4	47	4	3	5	5	5	5	3	3	31	3	5	5	5	5	4	5	5	5	5	5	5	5	62
96	2	3	1	3	3	3	2	4	3	1	5	5	5	5	4	5	5	5	5	5	4	4	57	4	5	4	5	5	4	4	4	35	3	5	5	5	5	5	5	5	5	5	5	5	5	63
97	2	2	1	2	1	1	2	1	1	1	4	3	4	3	4	3	2	3	3	4	2	3	38	2	2	2	1	2	2	4	2	17	3	5	5	4	5	5	5	5	5	5	5	5	5	62
98	2	3	1	2	2	3	2	2	1	1	4	4	4	5	5	5	5	5	5	5	5	5	57	3	4	4	2	4	4	3	3	27	3	5	5	5	5	5	5	5	5	5	5	5	5	63
99	1	2	2	2	1	1	2	1	1	1	4	4	4	4	3	4	4	4	4	4	4	4	47	3	3	3	3	3	3	3	3	24	4	4	4	5	4	5	4	4	4	4	4	4	4	54
100	2	3	1	2	1	3	2	1	1	1	5	5	5	5	5	5	5	5	5	5	5	5	60	5	5	5	5	5	5	5	5	40	3	5	5	4	5	4	4	5	5	5	5	5	4	59
101	1	3	1	2	2	3	1	4	1	1	4	4	4	4	4	4	4	4	4	4	4	4	48	4	4	4	2	3	4	4	3	28	4	4	4	4	4	4	4	4	4	4	4	4	4	52
102	2	2	2	2	1	1	2	1	1	1	4	4	4	4	4	4	4	4	5	4	5	4	50	4	4	4	4	4	4	4	4	32	4	5	5	4	5	4	5	5	5	5	4	5	5	61
103	2	2	1	2	2	3	2	1	1	1	4	4	4	4	4	4	4	4	4	4	4	4	48	4	4	4	4	4	4	3	3	30	3	5	5	5	5	5	5	5	5	5	4	5	5	62
104	2	1	2	2	1	1	2	1	1	1	4	4	4	4	4	4	4	4	3	4	4	4	47	3	3	3	2	2	2	3	3	21	3	5	4	5	4	4	4	4	4	4	4	4	4	53
105	2	2	1	2	1	2	1	1	1	1	5	5	5	5	5	5	4	4	4	5	5	5	57	3	5	4	5	5	5	5	4	36	3	5	4	4	5	4	4	5	4	5	4	5	4	56
106	2	3	1	2	2	3	2	2	1	1	4	4	4	4	4	4	4	4	4	4	4	4	48	4	3	4	3	3	3	3	3	26	4	5	5	5	5	4	4	4	4	5	4	5	4	58
107	2	3	1	2	2	3	2	2	1	2	3	3	3	3	3	3	3	3	3	3	3	5	38	3	2	2	1	2	2	3	2	17	4	5	4	4	5	4	4	4	4	5	4	5	4	56
108	2	2	1	2	1	2	2	1	1	1	4	4	4	4	4	4	4	4	4	4	4	3	47	4	5	4	1	2	2	2	2	22	3	5	5	4	5	4	5	5	5	5	5	5	5	61
109	2	2	1	2	1	2	2	1	1	1	4	4	4	4	4	4	4	4	4	4	4	4	48	4	4	4	4	4	4	4	3	31	4	4	4	4	5	5	4	5	5	5	4	5	4	58
110	1	2	2	3	1	1	2	1	1	1	3	1	1	4	4	4	4	4	4	4	4	4	41	5	4	4	4	4	4	4	4	33	4	5	5	4	5	5	5	5	5	5	5	5	5	63
111	2	1	2	2	1	1	2	1	1	1	4	4	4	4	4	4	3	4	4	4	4	4	47	4	4	4	2	4	4	3	3	28	3	5	5	5	5	5	5	5	5	5	4	5	5	62
112	2	1	2	2	1	1	2	1	1	1	4	4	4	5	4	5	5	5	4	5	5	3	53	4	4	5	4	5	5	4	4	35	4	5	5	4	5	4	4	5	5	5	4	5	4	59
113	2	2	2	2	1	1	1	1	1	1	4	5	5	5	5	5	4	4	4	4	4	4	53	4	4	4	4	4	4	4	4	32	4	5	5	5	5	4	5	5	5	5	4	5	5	62
114	2	2	1	2	1	1	1	1	1	1	4	4	4	4	4	4	4	4	4	4	4	4	48	3	4	4	1	3	1	2	2	20	4	5	5	4	5	4	5	5	5	5	4	5	5	61
115	2	1	2	2	1	1	1	1	1	1	4	4	4	4	4	4	4	4	4	4	4	4	48	4	4	4	4	4	4	4	4	32	4	4	4	4	5	4	4	4	4	4	4	5	4	54
116	2	2	1	2	2	3	2	1	1	2	3	3	3	3	3	3	4	3	3	3	3	3	37	3	3	3	2	2	2	2	2	19	3	5	5	5	5	5	5	5	5	5	5	5	5	63
117	1	1	2	2	1	1	1	1	1	1	5	4	4	4	3	3	4	4	4	5	4	4	48	4	4	4	3	4	4	4	3	30	4	5	5	5	5	4	5	5	5	5	5	5	5	63
118	2	1	2	2	1	1	2	1	1	2	4	4	4	4	3	3	3	3	3	3	3	3	40	3	3	3	3	3	3	4	3	25	4	4	4	5	5	4	4	4	5	4	4	5	4	56
119	2	1	2	3	1	1	1	4	1	2	4	5	5	4	3	4	4	5	5	4	5	5	53	4	4	4	4	5	4	4	5	34	4	5	4	5	4	4	4	4	5	4	4	4	4	55
120	2	1	2	3	1	1	2	4	1	2	5	4	4	4	4	4	4	5	5	4	4	4	51	4	4	4	4	4	4	4	3	31	3	5	4	5	5	5	4	5	4	5	4	5	4	58
121	2	2	2	3	1	1	2	4	3	2	4	4	4	4	4	4	3	4	4	4	4	4	47	3	3	3	3	4	3	3	3	25	4	5	5	5	5	5	5	5	5	5	4	5	5	63
122	2	2	2	3	1	1	2	4	1	1	4	4	4	4	4	4	4	4	4	4	4	4	48	4	4	4	4	4	4	4	4	32	3	5	5	4	5	4	5	5	5	5	5	5	5	61
123	2	1	2	3	1	1	2	1	1	2	4	4	4	2	2	3	3	3	3	3	3	3	37	3	2	3	4	3	4	4	2	25	4	5	5	5	5	5	5	5	5	5	5	5	5	64
124	1	4	1	3	3	3	2	2	1	1	4	5	4	4	5	5	4	4	5	4	4	4	52	4	5	5	3	3	4	4	4	32	4	5	4	4	5	5	5	4	5	5	5	5	5	61
125	2	2	2	3	1	1	2	4	1	1	5	5	5	5	5	5	5	5	5	5	5	5	60	4	5	5	5	5	5	5	5	39	3	5	5	5	5	5	5	5	5	5	5	5	5	63
126	1	1	2	3	1	1	2	4	1	1	1	3	4	4	4	4	4	4	4	5	5	5	47	3	2	4	4	4	4	4	4	29	3	5	5	5	5	5	5	5	5	5	5	5	5	63
127	2	3	1	2	2	3	2	1	1	1	4	4	4	4	4	4	4	5	4	4	4	5	50	4	3	5	5	4	4	4	5	33	3	5	5	5	4	5	5	5	5	5	5	4	5	61
128	2	2	1	3	2	2	1	4	1	2	5	5	5	5	5	5	3	3	3	3	3	3	48	3	3	3	3	3	3	3	3	24	3	5	5	5	5	4	4	5	5	5	5	5	4	60
129	2	1	2	3	1	1	2	2	1	1	1	5	5	3	3	4	4	4	4	5	3	3	44	2	4	4	3	4	4	4	4	29	3	5	5	5	5	5	5	5	5	5	5	5	5	63
130	2	3	1	2	2	3	1	1	1	2	4	4	4	4	4	4	4	4	4	3	3	3	45	4	4	3	3	3	3	3	2	25	3	5	5	5	5	5	5	5	5	5	5	5	5	63
131	2	2	1	2	2	2	2	2	1	2	4	4	4	4	4	4	3	4	4	4	4	4	47	3	3	3	3	3	4	3	3	25	3	5	4	5	4	4	4	4	4	4	4	4	4	53
132	1	1	2	3	1	1	2	4	1	1	5	5	5	5	5	5	5	5	5	3	5	5	58	5	3	5	5	5	5	3	5	36	3	5	5	5	5	4	5	5	5	5	5	5	5	62
133	1	2	1	3	2	3	2	1	1	1	4	4	5	5	4	4	5	4	5	4	5	4	53	4	3	3	4	4	3	3	4	28	4	5	5	4	5	5	5	5	5	5	5	5	5	63
134	2	3	1	2	2	3	2	4	1	2	4	4	4	4	4	4	4	4	4	4	4	4	48	4	4	4	4	4	4	4	4	32	4	4	4	4	4	4	4	4	4	4	4	4	4	52
135	2	2	2	2	2	2	2	4	1	2	3	4	3	4	4	4	2	4	4	4	3	4	43	3	3	3	3	3	4	4	3	26	4	4	4	5	4	4	4	4	4	4	4	4	4	53
136	2	2	1	2	2	3	1	2	1	1	4	4	4	4	4	4	4	4	4	4	4	4	48	3	3	3	3	3	3	3	3	24	4	5	4	5	5	4	4	4	5	5	4	5	4	58
137	2	1	2	3	1	1	2	4	1	2	5	5	5	5	5	5	3	5	5	5	5	3	56	5	5	5	5	5	5	5	5	40	3	5	5	4	5	4	5	5	5	5	4	5	5	60
138	2	3	1	2	2	3	1	2	1	2	5	5	5	5	5	5	5	5	5	5	5	5	60	4	5	3	5	5	2	5	5	37	4	4	4	5	5	4	4	4	4	4	4	5	4	55
139	2	2	1	3	2	1	2	4	2	2	3	4	4	4	4	4	3	3	3	4	3	4	43	4	3	4	3	3	3	3	2	25	4	4	4	4	5	4	4	5	5	5	5	5	4	58
140	2	3	1	2	3	3	2	3	1	1	5	5	5	5	5	5	5	5	5	5	5	5	60	4	4	4	3	4	3	3	4	29	4	5	4	5	4	4	4	4	5	4	4	4	4	55
141	2	3	1	2	2	3	2	1	1	1	4	4	4	4	4	4	4	4	3	4	4	4	47	4	4	4	3	4	4	3	4	30	3	5	5	4	5	5	5	5	5	5	5	5	5	62
142	2	1	2	3	1	1	2	1	1	2	4	5	5	5	5	5	4	5	4	5	5	4	56	5	5	5	3	4	4	4	3	33	3	5	5	4	5	5	5	5	5	5	5	5	5	62
143	2	2	2	2	1	1	2	1	1	1	4	4	4	4	3	4	4	4	4	4	4	4	47	4	4	4	4	3	5	3	4	31	4	4	4	5	4	4	4	4	4	4	4	4	4	53
144	2	2	1	2	2	2	1	2	2	2	4	4	4	4	3	4	2	2	4	4	4	4	43	3	3	3	3	2	2	2	2	20	4	4	4	5	5	4	4	4	5	4	4	5	4	56
145	2	2	1	2	2	3	2	3	1	1	4	4	5	5	5	5	4	5	5	5	4	5	56	4	3	4	4	4	5	4	4	32	4	4	4	5	4	5	5	5	4	4	4	4	5	57
146	2	4	1	2	3	3	2	2	1	1	4	4	3	3	4	3	4	4	4	4	4	5	46	5	5	5	4	5	5	3	4	36	3	5	5	4	5	4	5	5	5	5	5	5	5	61
147	2	2	1	2	2	3	2	1	1	1	3	4	4	4	5	5	4	3	3	3	4	3	45	3	3	3	2	3	2	3	2	21	3	5	5	4	5	5	5	5	5	5	4	5	5	61
148	2	2	1	2	1	1	2	1	1	2	4	4	4	4	4	4	4	4	4	3	3	4	46	5	4	4	4	4	3	3	4	31	3	5	5	5	5	4	5	4	4	5	4	5	5	59
149	2	3	1	2	3	3	2	1	1	2	4	4	4	4	4	4	3	4	4	4	4	4	47	3	3	3	2	3	3	3	3	23	3	5	5	5	5	5	5	5	5	5	5	5	5	63
150	2	3	1	2	2	3	2	1	1	1	4	4	4	4	5	5	5	5	5	5	5	5	56	3	3	3	3	3	3	3	3	24	4	4	4	4	4	4	4	4	4	5	4	4	4	53
151	2	3	1	2	2	3	2	2	1	1	3	4	1	4	4	4	4	3	3	4	3	4	41	3	4	4	2	3	3	3	3	25	3	5	5	4	5	5	5	5	5	5	4	5	5	61
152	2	3	1	2	2	3	1	1	2	1	4	4	4	2	3	3	4	4	4	4	4	4	44	3	3	3	1	2	3	2	2	19	3	5	5	4	4	5	5	5	5	5	5	4	5	60
153	2	2	1	2	2	3	1	4	1	1	4	4	4	4	4	4	4	4	4	4	4	3	47	4	2	1	2	2	3	3	3	20	3	5	5	4	5	5	4	5	5	5	5	5	4	60
154	2	2	1	2	2	3	1	3	2	1	4	4	4	4	5	4	4	4	3	4	3	3	46	3	4	3	3	4	3	4	3	27	4	5	5	5	4	5	5	5	5	5	5	4	5	62
155	2	3	1	2	2	3	2	2	2	1	4	4	4	4	4	5	4	5	4	5	4	4	51	3	3	3	1	3	3	2	3	21	3	5	5	5	5	4	5	5	5	5	5	5	5	62
156	2	3	1	1	2	3	2	1	2	2	4	3	4	4	4	3	3	3	4	4	5	5	46	3	3	3	4	4	4	4	3	28	4	4	4	5	5	4	4	4	5	4	5	5	4	57
157	2	3	1	2	2	3	1	1	2	1	4	4	4	4	4	4	3	4	4	4	4	4	47	3	3	3	3	3	3	4	3	25	4	5	5	5	5	4	5	5	4	5	4	5	5	61
158	2	2	1	2	2	2	2	1	2	1	4	4	4	4	4	4	4	4	4	4	4	4	48	4	4	4	3	4	3	4	4	30	3	5	5	4	5	4	5	5	4	5	5	5	5	60
159	2	2	2	2	1	1	1	1	2	2	4	4	4	4	5	5	4	4	4	4	4	4	50	4	4	4	3	4	4	3	4	30	3	5	5	5	5	5	5	5	5	5	5	5	5	63
160	2	2	2	2	1	2	2	1	2	1	3	5	5	4	4	4	4	4	4	5	4	4	50	4	4	4	3	3	3	3	3	27	3	5	4	5	5	5	5	5	5	5	4	5	5	61
161	2	3	1	2	2	3	1	3	1	2	4	4	4	5	5	5	2	4	4	4	4	4	49	4	5	5	5	5	5	5	4	38	4	5	4	5	5	4	4	4	4	4	4	5	4	56
162	2	2	1	1	1	1	2	4	2	1	4	4	1	4	4	4	5	5	5	5	4	5	50	4	3	4	4	5	4	4	4	32	4	4	4	5	5	4	4	5	4	5	4	5	4	57
163	1	2	1	2	2	3	2	2	1	1	5	5	5	3	5	5	5	5	5	5	5	5	58	5	4	4	4	4	4	4	4	33	4	5	5	5	5	4	5	5	5	5	5	5	5	63
164	2	2	1	2	2	3	2	2	1	1	4	3	4	4	4	4	3	4	4	4	4	4	46	3	3	4	2	3	4	4	3	26	4	4	4	4	5	4	4	4	4	4	4	5	4	54
165	2	2	2	2	2	3	1	2	1	1	4	4	4	4	4	4	4	4	4	4	5	4	49	5	4	4	1	4	2	3	3	26	4	4	4	5	5	4	4	5	5	5	4	5	4	58
166	2	3	1	2	2	3	2	2	1	1	5	5	5	5	5	5	5	5	5	5	5	5	60	4	4	4	3	3	3	3	3	27	4	4	4	4	4	4	4	4	4	4	4	4	4	52
167	2	2	1	2	2	3	1	1	1	2	4	4	4	4	4	4	4	3	4	4	3	4	46	3	3	3	2	2	3	3	2	21	4	5	5	4	5	5	4	5	5	5	5	5	4	61
168	2	3	1	2	2	3	2	2	1	1	3	3	3	3	3	3	3	3	3	3	3	3	36	3	5	5	2	1	1	1	1	19	4	4	4	5	4	4	5	4	5	4	4	4	5	56
169	2	2	1	2	2	3	2	1	1	2	4	4	4	4	4	4	4	4	4	4	4	4	48	3	4	3	1	2	2	2	3	20	4	5	5	4	5	5	4	5	5	5	4	5	4	60
170	2	1	2	3	1	1	2	1	1	2	4	4	5	4	5	5	4	5	4	4	4	4	52	5	5	4	3	4	4	5	4	34	3	5	5	4	4	5	5	4	5	5	5	4	5	59
171	2	1	2	2	1	1	2	1	1	2	3	2	4	5	3	5	3	5	4	5	3	4	46	2	3	2	1	2	2	3	2	17	4	4	4	4	4	4	4	4	4	4	4	4	4	52
172	2	2	3	2	2	3	2	2	1	1	3	4	4	4	3	3	5	4	4	3	4	4	45	3	3	3	2	2	2	2	2	19	4	5	4	4	5	5	5	4	4	5	5	5	5	60
173	2	2	1	2	2	3	2	2	2	2	4	4	4	4	5	4	5	5	5	5	5	4	54	3	4	4	2	2	2	3	2	22	4	5	5	5	5	4	4	4	4	5	4	5	4	58
174	2	2	2	2	2	2	2	1	1	1	5	4	4	4	1	2	3	3	4	4	4	3	41	2	4	2	2	3	2	4	4	23	3	5	5	5	5	5	5	5	5	5	5	5	5	63
175	2	2	1	2	2	3	2	2	1	1	4	4	4	5	5	4	5	4	4	4	5	4	52	4	3	4	4	4	4	4	3	30	3	5	5	5	5	5	5	5	5	5	5	5	5	63
176	1	2	1	2	1	2	2	1	1	1	4	4	5	5	5	4	4	4	5	5	5	5	55	4	3	3	2	3	4	4	4	27	3	5	5	5	5	5	5	5	5	5	5	5	5	63
177	2	2	1	2	1	2	2	1	1	1	4	3	4	4	4	4	4	4	4	4	4	4	47	3	3	3	3	3	3	3	3	24	3	5	5	5	5	5	5	5	5	5	5	5	5	63
178	2	3	1	2	3	3	2	1	1	2	3	4	4	4	5	3	2	5	4	4	4	4	46	3	3	3	1	2	2	3	3	20	3	5	5	4	5	5	5	5	5	5	5	5	5	62
179	2	2	1	2	1	1	1	4	1	1	5	5	5	5	5	5	5	5	5	5	5	5	60	4	4	4	3	5	4	5	4	33	4	4	4	5	5	5	5	4	4	5	4	5	5	59
180	2	2	2	2	1	1	2	1	1	1	4	4	4	4	4	4	4	4	4	4	4	4	48	4	3	4	2	4	3	3	3	26	4	4	5	5	5	5	5	5	4	5	4	5	5	61
181	2	2	1	2	2	2	1	3	1	1	4	4	4	4	4	4	4	4	4	4	4	4	48	4	3	3	3	3	3	3	3	25	3	5	5	4	5	4	5	5	5	5	5	5	5	61
182	1	2	1	2	2	2	2	3	1	1	4	4	5	5	4	5	4	4	5	4	4	3	51	3	4	3	2	2	2	3	2	21	3	5	5	5	5	4	4	4	5	5	5	5	4	59
183	2	2	1	2	1	1	2	1	1	1	4	5	5	5	4	5	4	5	4	4	4	4	53	3	3	3	2	2	2	3	2	20	4	4	4	5	4	4	4	5	4	4	4	4	4	54
184	1	2	2	2	1	1	2	1	1	2	4	4	4	5	4	5	4	4	4	5	5	4	52	4	4	3	3	4	4	4	3	29	3	5	5	5	5	4	5	5	4	5	5	5	5	61
185	2	2	1	2	1	1	1	1	1	1	5	5	5	4	4	4	5	5	5	5	4	4	55	5	4	4	4	4	4	4	4	33	4	4	5	5	5	4	4	4	4	4	4	5	4	56
186	2	2	1	2	1	2	2	1	1	1	4	4	4	4	4	4	4	4	4	4	4	4	48	3	3	3	1	3	3	4	3	23	4	5	5	4	5	5	5	5	4	4	4	5	5	60
187	2	3	1	2	2	3	1	1	1	1	4	4	4	5	5	5	5	5	5	5	5	5	57	4	4	4	4	4	4	5	5	34	4	4	4	5	4	4	4	5	5	5	4	4	4	56
188	1	1	2	2	1	1	2	1	1	2	5	4	4	5	5	3	5	5	4	5	4	4	53	3	4	4	4	3	4	5	2	29	4	4	4	4	4	4	5	5	5	4	4	4	5	56
189	1	2	1	2	2	2	2	1	1	1	4	4	4	5	5	4	5	4	4	5	5	5	54	4	4	4	4	4	4	4	4	32	4	4	4	5	4	4	4	4	4	4	4	4	4	53
190	2	1	2	2	1	1	2	1	1	2	4	4	4	3	4	4	3	4	4	4	4	4	46	3	4	3	3	3	3	3	2	24	3	5	5	5	5	4	4	5	5	5	4	5	4	59
191	1	1	2	2	1	1	1	1	1	1	5	5	5	5	5	5	5	5	5	5	5	5	60	4	4	4	4	4	4	3	4	31	4	4	4	4	5	4	4	4	4	4	4	5	4	54
192	2	3	1	2	2	3	1	2	1	1	4	4	4	5	4	4	4	4	4	4	4	5	50	4	3	4	3	3	4	4	4	29	4	5	5	5	5	5	4	5	4	5	5	5	4	61
193	1	1	2	2	1	1	2	1	1	1	5	5	5	5	4	5	4	5	4	4	5	5	56	4	4	3	2	4	4	3	4	28	3	5	5	5	5	4	5	5	5	5	4	5	5	61
194	1	2	2	2	1	1	2	1	2	2	4	4	4	4	4	4	4	4	4	4	4	4	48	4	4	4	4	4	4	4	4	32	4	5	5	4	4	4	4	4	4	4	4	4	4	54
195	2	3	1	2	2	3	2	2	1	2	4	5	4	5	4	5	4	5	5	4	5	4	54	3	3	3	2	2	3	3	3	22	4	4	4	5	4	4	4	4	4	4	4	4	4	53
196	2	3	1	2	2	3	2	1	1	2	4	5	5	4	4	4	4	4	4	4	4	4	50	4	4	4	4	4	4	4	4	32	4	5	5	4	5	5	5	5	5	5	5	5	5	63
197	2	2	1	2	2	2	2	2	1	1	4	4	4	4	4	4	4	4	4	4	4	4	48	3	3	3	3	3	3	3	3	24	4	4	4	4	4	4	4	4	4	4	4	4	4	52
198	2	2	1	2	2	2	2	1	1	1	5	4	5	5	5	3	4	5	5	4	5	5	55	4	4	4	4	4	4	4	4	32	3	5	5	5	5	4	5	5	5	5	5	5	5	62
199	1	2	2	2	2	3	2	1	1	1	5	5	5	5	5	5	5	5	5	5	5	5	60	5	5	5	5	5	5	5	5	40	4	4	4	4	4	4	4	4	4	4	4	4	4	52
200	2	2	2	2	1	1	2	3	1	1	4	4	5	4	5	4	4	4	5	4	4	4	51	3	3	3	1	2	2	3	3	20	4	5	5	4	5	4	4	5	4	5	4	5	4	58
201	1	3	1	2	2	3	2	1	1	2	4	4	5	5	5	5	5	5	3	5	3	5	54	3	3	3	3	3	3	3	3	24	4	5	5	5	5	4	5	5	5	5	4	5	5	62
202	2	3	1	2	1	3	2	2	1	1	3	3	5	3	5	4	5	5	5	5	5	4	52	2	2	2	2	2	3	3	3	19	4	5	5	5	5	5	5	5	5	5	4	5	5	63
203	2	2	2	2	1	2	2	2	1	2	4	4	4	4	4	4	4	4	4	4	4	4	48	3	3	3	2	3	3	4	2	23	3	5	5	5	5	4	4	5	5	5	5	5	4	60
204	2	1	2	2	1	1	1	1	1	1	3	4	4	4	4	4	4	4	4	4	4	4	47	4	4	4	4	4	4	4	4	32	3	5	5	4	5	5	4	5	5	5	4	5	4	59
205	2	2	2	3	1	1	2	1	1	2	3	3	5	4	5	5	5	2	5	5	4	4	50	3	3	3	3	3	2	3	4	24	4	5	5	5	5	4	4	5	5	5	4	5	4	60
206	2	1	2	2	1	1	1	1	1	2	4	4	4	4	4	4	4	4	4	4	4	4	48	4	4	4	3	3	3	3	4	28	3	5	5	5	5	5	5	5	5	5	5	5	5	63
207	2	2	2	3	1	1	2	1	1	1	5	5	5	5	5	5	5	5	5	5	5	5	60	5	4	4	3	3	4	4	4	31	3	5	5	4	5	5	5	5	5	5	5	5	5	62
208	1	1	2	2	1	1	2	1	1	1	5	5	5	5	5	5	5	5	5	5	5	5	60	5	5	5	5	5	5	5	5	40	4	4	4	5	4	4	4	4	4	5	4	4	4	54
209	2	2	2	2	1	1	1	1	1	1	4	4	4	4	5	4	4	3	3	3	3	4	45	3	5	5	5	5	3	3	5	38	3	5	4	5	5	5	5	5	5	4	4	5	5	60
210	2	2	1	2	1	1	2	1	1	1	4	4	4	4	4	4	4	4	3	4	4	3	46	3	3	3	2	2	3	3	2	21	4	4	4	5	5	4	4	4	5	4	4	5	4	56
211	2	2	2	2	1	1	2	1	1	1	3	4	4	4	4	4	3	4	4	4	4	4	46	3	4	4	3	4	3	3	3	27	3	5	5	5	5	4	5	5	5	5	4	5	5	61
212	1	2	1	2	1	1	2	2	1	1	5	5	5	5	5	5	5	5	5	4	4	5	58	4	4	4	3	3	3	3	3	27	4	5	5	5	4	4	4	5	4	5	4	4	4	57
213	2	2	2	2	1	2	2	1	1	2	5	5	5	5	5	5	5	5	5	5	5	5	60	4	5	5	2	3	3	3	3	28	4	5	5	5	5	5	5	5	5	5	4	5	5	63
214	1	2	1	2	1	1	1	1	1	1	4	4	4	4	4	4	4	4	4	4	4	4	48	4	4	5	4	5	5	5	4	36	4	4	4	4	4	4	4	4	4	4	4	4	4	52
215	2	2	2	2	1	1	2	1	1	1	5	5	5	5	5	5	5	5	5	5	5	5	60	5	5	5	5	5	5	5	5	40	3	5	5	5	5	5	5	5	5	5	5	5	5	63
216	1	2	2	2	1	1	1	1	1	2	5	5	5	5	5	5	5	5	5	5	5	5	60	5	5	5	5	5	5	5	5	40	4	5	5	5	5	4	4	5	5	5	5	5	4	61
217	2	2	2	2	1	1	2	1	1	1	5	4	4	4	4	4	4	4	4	4	4	4	49	4	3	4	3	3	3	3	3	26	3	5	5	4	5	5	5	5	5	5	5	5	5	62
218	2	3	2	2	2	3	2	1	1	1	4	5	5	5	4	4	3	4	4	4	4	4	50	4	3	3	2	2	3	3	2	22	4	4	4	4	4	4	4	4	4	4	4	4	4	52
219	2	2	1	2	1	2	1	1	1	1	5	5	5	5	5	5	4	4	4	4	4	4	54	3	3	3	3	2	2	3	3	22	3	5	5	5	5	5	5	5	4	5	4	5	5	61
220	2	3	3	2	2	3	1	2	1	1	4	4	4	4	3	4	4	4	3	4	3	4	45	3	3	3	3	3	3	3	3	24	4	5	4	4	5	4	5	5	5	5	5	5	5	61
221	2	2	1	2	2	2	2	1	1	1	4	4	4	4	4	4	4	4	4	4	4	4	48	4	4	4	4	4	4	4	4	32	3	5	5	5	5	4	4	5	5	5	4	5	4	59
222	1	1	2	2	1	1	2	1	1	1	4	4	4	3	4	4	3	3	4	3	4	3	43	3	3	3	3	3	4	4	4	27	4	5	5	4	4	5	5	4	4	5	5	4	5	59
223	2	2	2	2	1	1	1	1	1	1	4	4	4	4	4	4	4	4	4	4	4	4	48	4	4	4	4	4	4	4	4	32	4	4	4	5	5	4	4	4	5	5	4	5	4	57
224	1	2	1	2	2	3	2	1	1	2	4	4	3	3	4	5	2	2	3	4	4	3	41	3	3	4	5	4	2	4	5	30	3	5	5	5	5	4	5	5	5	5	4	5	5	61
225	1	2	1	2	1	1	2	1	1	1	4	4	4	5	5	5	4	4	4	4	4	4	51	4	4	4	2	3	3	4	4	28	4	5	5	4	5	4	4	5	5	5	4	5	4	59
226	2	3	1	2	2	3	2	2	1	2	3	4	3	5	5	4	4	3	4	4	4	4	47	4	4	4	4	3	3	4	4	30	4	4	4	5	4	4	4	4	4	4	4	4	4	53
227	2	2	1	2	1	2	2	1	1	1	5	5	5	5	5	5	5	5	5	5	5	5	60	4	4	4	4	4	4	4	4	32	4	5	5	5	4	4	4	4	5	4	4	4	4	56
228	2	3	1	2	2	3	2	2	1	1	4	4	4	4	4	4	4	4	4	4	4	4	48	3	3	4	2	3	2	2	4	23	4	5	5	5	5	5	5	5	4	5	5	5	5	63
229	2	1	2	2	1	1	2	1	1	1	5	5	5	5	5	5	4	4	4	5	5	4	56	3	3	3	2	3	3	3	3	23	4	4	4	4	5	4	4	4	4	5	4	5	4	55
230	2	2	1	2	2	2	2	1	1	1	1	4	4	4	4	4	4	4	3	4	4	4	44	3	4	4	3	3	3	3	3	26	3	5	5	5	5	5	5	5	5	5	5	5	5	63
231	2	2	1	2	1	1	1	2	1	1	4	4	4	4	4	4	4	4	4	4	4	4	48	3	3	3	3	3	3	3	3	24	3	5	4	5	5	4	5	5	5	5	4	5	5	60
232	1	3	1	2	2	3	2	2	1	1	4	4	4	4	4	4	4	4	4	4	4	4	48	3	3	3	3	5	3	3	3	26	4	4	4	4	4	4	4	4	4	4	4	4	4	52
233	2	3	3	2	2	3	2	4	1	2	3	4	4	5	4	4	3	4	4	4	3	3	45	4	4	4	2	3	3	4	4	28	3	5	5	5	5	5	4	5	5	5	5	5	4	61
234	2	1	2	2	1	1	1	1	1	1	4	4	4	4	4	4	4	4	4	4	4	4	48	4	3	4	4	4	4	4	4	31	3	5	4	5	5	4	5	5	5	4	4	5	5	59
235	2	2	1	2	1	1	1	1	1	2	3	3	3	3	3	3	3	3	3	3	3	3	36	2	1	1	1	1	1	1	1	9	4	4	5	5	4	4	4	4	4	5	4	4	4	55
236	1	2	1	2	2	3	2	1	1	2	4	4	4	4	4	4	4	4	4	4	4	4	48	3	3	3	3	3	3	3	3	24	3	5	5	4	5	4	4	5	5	5	4	5	4	58
237	2	1	2	2	1	1	2	1	1	1	4	4	4	4	4	4	4	4	4	4	4	4	48	5	5	5	5	5	55	5	5	40	4	5	5	5	4	5	5	5	5	5	4	4	5	61
238	2	2	1	2	2	2	2	1	1	1	4	4	4	4	4	4	4	4	4	4	4	5	49	3	3	3	4	4	3	3	4	27	3	5	5	5	5	5	5	5	5	5	5	5	5	63
239	2	2	1	2	2	3	2	1	1	1	3	4	4	3	3	3	2	4	3	4	4	2	39	4	4	4	2	3	2	3	2	24	4	4	4	5	5	5	4	4	5	5	4	5	4	58
240	2	2	2	2	1	2	2	1	2	2	3	4	3	3	3	3	3	3	3	3	3	3	37	3	3	3	3	3	3	3	3	24	3	5	5	5	5	4	4	4	4	5	4	5	4	57
241	2	2	2	2	1	1	2	1	1	1	1	5	5	5	5	5	5	5	5	5	5	5	56	3	3	3	3	4	4	4	4	28	3	5	5	4	5	4	5	5	5	5	5	5	5	61
242	2	2	1	2	1	2	2	1	1	1	5	5	5	5	5	5	5	5	5	5	5	5	60	4	5	4	3	4	4	4	4	32	4	4	4	5	4	5	5	5	5	5	4	4	5	59
243	2	3	1	2	2	3	2	1	2	1	4	4	4	4	3	3	3	3	3	3	3	3	40	3	3	3	3	3	3	3	3	24	4	4	5	4	4	4	5	5	4	4	5	4	5	57
244	1	2	1	2	1	1	2	1	1	1	4	4	4	4	4	4	4	4	4	4	4	4	48	4	4	4	2	3	3	4	3	27	3	5	5	5	5	4	5	5	5	5	5	5	5	62
245	1	1	2	2	1	1	2	1	1	1	4	5	4	5	4	4	4	4	5	5	4	5	53	3	4	4	5	3	5	3	4	31	3	5	5	5	5	4	5	5	5	5	5	5	5	62
246	2	3	1	2	2	3	2	1	1	1	4	3	3	3	3	3	3	3	3	3	3	3	37	3	3	3	3	3	3	3	3	24	3	5	5	5	5	5	5	5	5	5	5	5	5	63
247	2	3	1	2	2	3	2	1	1	1	5	5	5	5	5	5	5	5	5	5	5	5	60	4	4	4	4	4	4	4	4	32	3	5	5	4	5	4	5	5	5	5	5	5	5	61
248	2	2	1	2	1	1	1	1	1	2	5	5	4	4	3	3	4	4	3	4	4	3	46	3	3	3	4	4	3	4	4	28	4	4	4	5	4	4	4	4	4	4	4	4	4	53
249	1	2	2	2	1	1	2	1	1	1	4	4	4	4	4	4	4	4	4	4	4	4	48	4	4	4	3	3	3	3	3	27	3	5	4	4	5	4	4	5	5	5	5	5	4	58
250	2	3	1	2	2	3	1	1	1	1	5	5	5	5	5	5	4	3	4	4	4	4	53	5	5	5	1	2	2	3	3	26	3	5	5	5	5	5	5	5	5	5	5	5	5	63
251	2	2	1	2	2	3	2	1	1	1	4	4	3	3	3	3	3	3	3	3	3	4	39	4	4	3	1	3	3	3	3	24	3	5	5	4	5	5	5	5	5	5	5	5	5	62
252	2	2	2	2	1	1	2	4	1	2	4	4	4	4	4	4	4	4	4	4	4	4	48	4	4	4	4	4	4	4	4	32	3	4	4	5	5	5	5	5	5	5	5	5	5	61
253	1	2	1	3	1	1	2	1	1	1	4	4	4	4	4	4	4	4	4	4	4	4	48	4	3	4	4	4	4	3	4	30	3	5	5	5	5	4	5	5	5	5	5	5	5	62
254	2	3	2	2	1	1	2	1	1	2	4	2	2	3	3	1	2	3	2	3	3	5	33	3	3	3	5	3	2	3	2	24	3	5	5	4	5	4	5	5	4	5	4	5	5	59
255	2	1	2	2	1	1	1	1	1	1	4	4	4	4	4	5	3	4	4	4	3	3	46	3	3	4	2	3	3	4	3	25	3	5	5	5	5	5	5	5	5	5	5	5	5	63
256	2	2	1	2	1	1	1	1	1	1	4	4	5	5	5	5	5	5	4	5	5	5	57	4	5	5	2	4	3	3	3	29	3	5	5	4	5	5	4	5	5	5	5	5	4	60
257	2	2	1	2	1	1	1	1	1	2	4	4	4	4	5	5	3	3	3	3	3	3	44	3	3	3	3	3	3	3	3	24	3	5	5	5	5	5	5	5	5	5	5	5	5	63
258	1	4	1	1	3	3	1	2	2	2	3	4	4	5	4	4	5	4	5	4	3	4	49	3	4	4	4	5	4	4	3	31	4	4	4	4	4	4	4	4	4	4	4	4	4	52
259	2	1	2	2	1	1	2	1	1	1	5	5	5	5	5	5	5	5	5	5	4	5	59	4	4	4	4	4	4	5	4	33	3	5	5	5	4	4	5	5	5	5	5	4	5	60
260	2	2	1	2	2	2	1	1	1	1	3	4	3	4	3	4	3	4	4	4	4	4	44	3	3	3	3	3	3	3	3	24	3	5	5	5	5	5	5	5	5	5	5	5	5	63
261	2	2	2	2	1	1	2	1	1	2	3	4	3	4	3	4	4	4	4	3	4	4	44	3	3	3	2	3	3	3	3	23	3	5	5	5	5	4	4	5	5	5	5	5	4	60
262	2	3	1	2	2	3	1	3	1	2	5	5	5	5	5	5	4	5	5	5	5	3	57	3	4	3	1	2	2	2	2	19	3	5	5	4	4	4	5	5	5	5	5	4	5	59
263	2	2	1	2	1	2	2	1	1	1	4	4	4	4	4	4	4	4	4	4	4	4	48	4	4	4	4	4	4	4	4	32	3	5	5	5	5	5	5	5	5	5	5	5	5	63
264	2	2	1	2	1	2	2	1	1	1	5	5	5	5	5	5	5	5	5	5	5	5	60	3	3	3	3	3	3	3	3	24	3	5	5	5	5	5	5	5	5	5	4	5	5	62
265	2	2	2	1	1	1	2	1	1	2	4	4	4	4	4	4	4	4	4	4	4	4	48	4	3	3	2	3	3	3	3	24	4	5	5	5	4	4	4	5	5	5	5	4	4	59
266	1	2	2	1	1	1	2	1	1	1	4	4	4	4	4	4	4	4	4	4	4	4	48	2	2	2	2	2	2	2	2	16	3	5	5	5	5	4	4	5	4	5	4	5	4	58
267	2	3	1	3	3	3	2	3	1	2	5	3	3	5	5	5	5	4	4	4	4	4	51	4	4	4	2	3	4	4	4	29	3	4	5	4	5	4	5	5	5	5	4	5	5	59
268	2	2	1	2	1	2	2	1	1	2	4	4	4	4	4	4	4	4	4	4	4	4	48	3	3	3	3	3	3	3	3	24	4	4	4	4	4	4	4	4	4	4	4	4	4	52
269	2	2	1	2	2	2	2	1	1	1	4	4	4	4	3	3	3	2	2	3	3	3	38	3	3	3	2	3	2	3	3	22	4	4	4	5	5	5	5	5	5	5	5	5	5	62
270	2	2	1	2	2	3	2	1	1	1	5	5	5	5	4	5	4	4	4	4	5	5	55	4	4	4	2	3	3	4	4	28	3	5	5	4	5	5	5	5	5	5	4	5	5	61
271	2	3	1	2	2	3	1	1	1	1	5	5	5	5	5	5	5	5	5	5	5	5	60	5	5	5	5	4	4	5	4	37	4	5	5	5	5	5	4	5	5	5	4	5	4	61
272	2	2	1	2	1	2	2	1	1	2	4	4	4	4	4	4	4	4	4	4	4	4	48	4	4	4	1	2	3	3	5	26	3	5	5	4	5	5	5	5	5	5	5	5	5	62
273	2	2	1	2	1	1	2	1	1	1	4	4	4	4	4	4	5	4	5	5	5	4	52	2	3	3	1	3	3	4	4	23	4	5	5	5	5	4	5	4	5	5	5	5	5	62
274	1	2	1	2	2	2	1	1	1	1	4	4	4	4	4	4	4	4	4	4	4	4	48	3	3	3	3	3	3	3	3	24	3	5	5	5	5	5	5	5	5	5	5	5	5	63
275	2	2	1	2	2	2	2	1	1	1	5	5	5	5	5	5	5	5	5	4	4	4	57	4	3	3	2	2	3	3	2	22	3	5	5	5	5	5	5	5	5	5	5	5	5	63
276	2	2	1	1	1	1	1	1	1	1	4	3	4	3	4	4	3	3	3	3	3	3	40	3	3	2	2	2	2	2	3	19	4	5	4	5	5	4	5	4	4	5	5	5	5	60
277	1	2	1	2	2	2	2	1	1	1	4	4	4	4	4	4	4	4	4	4	4	4	48	3	3	3	3	3	3	3	3	24	3	5	5	5	5	5	5	5	5	5	5	5	5	63
278	2	3	1	2	2	3	1	2	1	2	3	3	3	3	3	3	3	3	3	3	3	3	36	2	2	5	2	5	2	5	2	25	3	5	5	5	5	4	4	4	4	5	4	5	4	57
279	2	2	1	2	1	2	2	1	1	1	5	5	5	5	5	5	5	5	5	5	5	5	60	4	4	4	5	4	5	4	4	34	3	5	5	4	5	4	5	4	5	5	4	5	5	59
280	2	2	1	2	2	2	2	1	1	2	4	4	3	3	4	3	4	4	4	4	4	4	45	3	3	3	3	4	4	4	4	28	4	5	5	4	5	5	5	5	5	5	5	5	5	63
281	2	2	1	1	1	1	2	4	1	1	4	4	4	4	4	4	4	4	4	4	4	4	48	3	3	3	3	3	3	3	3	24	3	5	5	4	5	5	5	5	5	5	5	5	5	62
282	2	2	1	2	2	2	2	4	1	1	4	4	4	4	4	4	4	4	4	4	4	4	48	4	4	4	4	4	4	4	4	32	4	4	4	5	4	4	5	5	5	5	4	4	5	58
283	1	2	1	2	1	2	2	1	1	1	3	3	3	3	3	3	3	3	3	3	3	3	36	3	3	3	3	3	3	3	3	24	3	5	5	4	5	5	5	5	5	5	5	5	5	62
284	1	2	2	2	1	1	2	1	1	2	5	5	5	5	5	5	3	5	5	4	4	4	55	5	5	4	5	5	5	5	5	39	4	5	5	5	5	5	4	5	5	5	4	5	4	61
285	2	3	1	2	2	3	2	1	1	1	3	3	3	3	3	3	3	3	3	3	3	3	36	2	3	4	2	3	3	3	3	23	3	5	5	5	5	5	5	5	5	5	4	5	5	62
286	2	2	2	2	1	2	2	1	1	1	4	4	4	4	4	4	4	4	4	4	4	4	48	4	4	4	2	4	3	4	3	28	3	5	5	5	5	5	5	5	5	5	5	5	5	63
287	2	2	1	2	2	2	2	1	1	2	4	4	4	4	4	4	4	4	4	4	4	4	48	3	3	3	1	3	3	2	2	20	3	5	5	5	5	5	4	5	5	5	5	5	4	61
288	2	3	1	2	2	3	2	2	1	2	4	4	4	4	4	4	4	4	4	4	4	4	48	3	4	4	3	3	3	3	3	26	3	5	5	5	5	5	5	5	5	5	5	5	5	63
289	2	2	1	2	1	2	2	1	1	2	3	4	3	3	4	3	3	3	3	3	3	3	38	3	3	3	2	2	2	3	2	20	4	5	4	5	5	4	4	4	5	5	4	5	4	58
290	2	2	1	2	1	2	2	1	1	2	3	3	3	3	3	3	3	3	3	3	3	3	36	3	3	3	3	3	3	3	3	24	3	5	5	5	5	4	4	5	4	5	4	5	4	58
291	2	2	1	2	1	2	2	1	1	1	4	4	4	4	4	4	4	4	4	4	4	4	48	4	4	4	2	2	2	2	2	22	3	5	5	5	5	5	5	5	5	5	4	5	5	62
292	2	2	1	2	2	2	2	1	1	1	4	3	3	3	3	3	3	3	3	3	3	3	37	3	3	3	3	3	3	3	3	24	4	5	5	4	4	5	5	5	5	5	5	4	5	61
293	2	2	1	2	1	2	2	1	1	2	3	4	4	4	4	4	4	4	4	4	4	4	47	2	4	3	2	2	2	2	3	20	3	5	5	5	4	4	5	5	4	5	5	4	5	59
294	2	2	1	2	2	2	2	1	1	1	5	5	5	5	5	5	5	5	5	5	5	5	60	3	3	3	3	3	3	3	3	24	3	5	5	5	5	5	5	5	5	5	5	5	5	63
295	2	2	1	2	1	2	2	1	1	1	4	4	4	4	4	4	4	4	4	4	4	4	48	4	4	4	2	3	3	3	3	26	3	5	5	5	5	4	5	5	5	5	4	5	5	61
296	2	2	1	2	2	2	2	4	1	2	4	4	4	4	4	4	4	4	4	4	4	4	48	3	2	3	2	3	3	3	2	21	3	5	4	5	5	5	5	5	4	4	4	5	5	59
297	2	2	1	2	2	3	1	3	2	2	4	4	4	4	4	4	4	4	4	4	4	4	48	4	3	3	2	2	3	3	3	23	3	5	5	4	5	4	5	5	5	5	5	5	5	61
298	2	2	2	2	1	1	1	1	1	1	4	4	4	4	4	4	4	4	4	4	4	4	48	4	4	4	4	4	4	4	4	32	3	5	5	4	5	4	5	5	5	5	5	5	5	61
299	2	2	1	2	2	2	2	1	1	1	1	4	4	5	4	4	4	4	4	4	4	5	47	4	3	4	2	3	2	4	4	26	3	5	5	5	5	4	5	5	5	5	4	5	5	61
300	2	2	1	2	2	2	2	1	2	1	5	5	5	5	5	5	5	5	5	5	5	5	60	5	5	5	5	5	5	5	5	40	3	5	5	5	5	5	5	5	5	5	5	5	5	63
301	1	3	3	2	1	3	1	1	1	2	4	3	3	3	3	3	3	3	3	3	3	3	37	3	3	3	3	3	3	3	3	24	4	5	5	5	5	4	4	5	4	5	4	5	4	59
302	2	2	1	2	2	2	2	1	1	1	5	5	5	5	5	5	5	5	5	5	5	5	60	5	5	5	5	5	5	5	5	40	3	5	5	5	5	5	5	5	5	5	5	5	5	63
303	2	3	1	2	2	3	2	1	1	1	4	4	4	4	4	4	3	4	4	4	4	4	47	3	3	3	3	3	3	3	3	24	4	5	4	4	4	4	4	4	5	5	5	4	4	56
304	2	3	1	1	1	1	2	1	1	1	4	4	4	4	4	4	4	4	4	4	4	4	48	4	3	5	4	4	4	4	4	32	3	5	5	5	5	4	4	5	4	5	5	5	4	59
305	2	1	2	2	1	1	2	1	1	1	4	4	4	4	3	3	3	3	4	4	4	4	44	3	3	3	2	3	3	3	3	23	3	4	4	4	4	4	4	4	4	4	4	4	4	51
306	2	2	1	2	2	3	2	1	2	2	5	4	4	4	4	4	4	4	4	4	4	4	49	4	4	5	3	3	4	4	3	30	4	5	4	5	5	5	5	5	4	5	4	5	5	61
307	2	2	2	2	1	1	2	1	1	1	5	5	5	5	5	5	5	5	5	5	5	5	60	5	5	5	5	5	5	5	5	40	4	4	4	5	4	4	4	4	4	4	4	4	4	53
308	2	3	1	2	2	3	2	2	1	1	2	4	4	3	3	4	4	4	3	4	4	4	43	3	3	3	3	3	3	3	3	24	3	5	5	4	5	4	4	4	5	5	4	5	4	57
309	2	2	2	1	1	1	1	1	1	2	4	4	4	4	4	4	4	4	4	4	4	4	48	3	3	3	3	3	3	3	3	24	4	4	4	5	5	4	5	5	4	5	4	5	5	59
310	2	2	1	2	1	1	2	1	1	2	5	5	5	5	5	5	5	5	5	5	5	5	60	4	4	4	5	4	5	4	5	35	3	5	5	5	5	5	4	5	5	5	5	5	4	61
311	2	2	1	2	1	1	2	1	1	1	4	4	4	4	4	4	4	4	4	4	4	4	48	4	4	4	3	4	4	4	4	31	3	5	4	5	5	5	5	5	4	5	4	5	5	60
312	2	2	1	2	1	2	2	1	1	1	4	4	4	4	3	4	4	4	4	4	4	4	47	3	4	4	2	3	3	3	4	26	3	5	5	5	5	4	4	5	4	5	5	5	4	59
313	2	2	1	2	1	1	1	1	1	1	4	4	4	4	4	4	4	4	4	4	4	4	48	4	4	4	4	4	4	4	4	32	4	5	5	5	5	4	4	5	5	5	4	5	4	60
314	1	2	1	2	1	2	2	2	1	1	4	4	3	4	3	3	3	4	4	4	3	3	42	3	3	3	3	3	2	2	2	21	4	5	5	5	5	4	5	5	5	5	4	5	5	62
315	2	2	1	2	1	1	2	4	1	1	5	5	5	5	5	5	5	5	5	5	5	5	60	4	4	4	2	3	3	3	4	27	3	5	5	5	5	5	5	5	5	5	5	5	5	63
316	2	2	1	2	1	2	1	1	1	1	4	4	4	3	4	4	4	3	3	4	4	4	45	4	3	3	2	3	3	3	3	24	3	5	5	5	5	5	5	5	5	5	5	5	5	63
317	2	1	2	2	1	1	1	4	1	1	3	3	3	3	3	3	3	3	3	3	3	3	36	3	3	3	3	3	3	3	3	24	3	5	5	5	5	4	5	4	5	5	4	5	5	60
318	2	2	2	3	1	1	2	1	1	1	5	5	4	5	3	4	4	4	4	4	4	4	50	4	4	4	2	4	4	4	4	30	3	5	5	5	5	5	5	5	5	5	5	5	5	63
319	2	2	1	2	2	2	2	1	1	1	4	4	4	5	4	4	3	4	4	4	4	4	48	4	4	3	3	3	4	3	3	27	3	5	5	5	5	5	5	5	5	5	4	5	5	62
320	2	2	1	2	2	2	2	1	1	1	4	4	4	4	4	4	4	4	4	4	4	4	48	3	4	3	2	3	3	4	2	24	3	5	5	5	5	4	5	5	5	5	5	5	5	62
321	2	2	1	2	1	2	2	1	2	1	4	4	4	4	3	3	4	4	3	4	3	3	43	3	3	3	3	3	3	3	3	24	4	5	4	5	4	5	5	5	5	5	5	4	5	61
322	2	2	1	2	2	2	2	1	1	2	5	5	5	5	5	3	5	5	5	5	4	4	56	5	5	5	5	5	5	5	5	40	3	5	5	5	5	4	4	5	5	5	4	5	4	59
323	2	2	1	1	1	2	2	1	2	1	4	4	4	4	4	4	4	4	4	4	4	4	48	4	4	4	3	3	3	4	4	29	3	5	5	4	5	4	5	5	5	5	5	5	5	61
324	2	2	1	2	1	2	2	1	1	1	4	4	4	4	4	4	4	4	4	4	4	4	48	4	4	4	2	3	2	2	3	24	3	5	5	5	5	5	5	5	5	5	5	5	5	63
325	2	2	1	2	1	2	2	1	1	2	4	4	4	4	4	4	4	4	4	4	4	4	48	4	4	4	4	4	4	4	4	32	4	4	4	4	4	4	4	4	4	4	4	4	4	52
326	2	3	1	2	2	2	2	1	1	2	4	4	4	4	5	5	4	5	5	5	5	5	55	4	4	4	4	4	3	4	4	31	4	5	5	5	5	4	5	4	5	5	5	5	5	62
327	2	2	2	2	1	1	1	1	1	1	5	5	5	5	5	5	5	5	5	5	5	5	60	5	5	5	5	5	5	5	5	40	4	4	5	5	5	4	4	5	4	5	4	5	4	58
328	2	2	1	1	1	2	2	1	1	1	3	3	4	4	3	3	3	4	4	4	4	4	43	3	3	3	3	3	3	3	3	24	3	5	5	4	5	5	5	5	5	5	5	5	5	62
329	2	2	1	2	1	2	2	1	1	1	4	5	4	4	4	5	5	5	4	4	5	5	54	3	4	3	2	3	4	5	4	28	3	5	5	5	5	5	5	5	5	5	5	5	5	63
330	2	2	1	2	1	2	2	1	2	2	4	4	4	4	4	4	4	4	4	4	4	4	48	2	2	2	1	3	2	3	1	16	4	4	4	4	4	4	5	4	5	4	4	4	5	55
331	2	2	2	2	1	1	2	4	1	1	4	3	4	5	4	5	4	4	4	4	4	5	50	3	4	3	3	3	4	4	3	27	4	5	5	4	5	4	5	5	4	5	5	5	5	61
332	2	1	2	2	1	1	2	4	3	2	3	3	3	3	3	3	3	3	3	3	3	3	36	4	3	3	3	3	3	3	3	25	3	5	5	4	5	4	5	5	5	5	5	5	5	61
333	2	3	1	2	2	3	2	4	1	1	5	4	4	4	4	4	4	4	4	4	4	4	49	3	3	3	3	3	3	3	3	24	4	4	4	5	5	4	4	4	4	4	4	5	4	55
334	2	2	2	2	1	1	1	1	2	1	4	4	4	5	4	4	3	4	4	4	3	4	47	3	4	4	2	3	2	4	3	25	4	4	4	4	4	5	4	4	4	4	4	4	4	53
335	2	2	2	2	1	1	2	1	1	1	4	4	4	4	4	4	4	3	4	4	4	4	47	4	3	2	1	2	2	2	3	19	4	5	5	5	5	4	4	4	4	4	5	5	4	58
336	2	2	1	2	2	3	1	1	1	1	5	5	5	5	5	5	5	5	5	5	5	5	60	5	5	5	5	5	5	3	4	37	3	5	5	5	5	5	5	5	5	5	4	5	5	62
337	2	2	2	3	1	1	2	1	1	1	4	4	4	4	4	4	3	3	3	3	3	3	42	3	2	4	4	2	4	3	3	25	4	4	4	5	4	4	4	4	4	5	4	4	4	54
338	2	2	1	2	1	1	2	1	1	1	4	4	4	4	4	4	4	4	4	4	4	4	48	3	3	3	3	2	2	2	2	20	4	5	5	5	5	4	5	5	5	5	4	5	5	62
339	2	2	1	2	2	3	2	1	1	1	5	5	5	5	5	5	5	5	5	5	5	5	60	4	4	5	2	4	4	4	4	31	4	5	5	5	5	4	5	5	5	5	5	5	5	63
340	2	3	1	2	2	3	2	2	1	1	4	4	4	4	4	4	4	4	4	4	4	4	48	4	4	4	4	4	4	4	4	32	4	5	5	5	4	4	5	5	5	5	4	4	5	60
341	2	2	1	2	1	2	2	1	1	1	4	4	4	4	4	4	4	4	4	4	4	4	48	3	3	3	3	3	4	4	4	27	3	5	5	4	5	4	4	5	5	5	5	5	4	59
342	1	2	2	3	1	1	2	1	1	1	4	5	4	5	5	5	4	4	4	4	4	4	52	4	4	4	3	3	2	4	4	28	4	4	4	5	5	4	4	4	5	5	4	5	4	57
343	2	3	1	2	3	3	2	3	1	1	5	5	5	5	5	5	5	4	4	4	4	5	56	4	4	4	3	3	3	3	4	28	3	5	5	4	5	4	5	5	5	5	5	5	5	61
344	2	3	2	2	1	3	2	1	1	2	4	4	4	4	4	4	4	4	4	4	4	4	48	4	4	4	4	4	4	4	4	32	3	5	5	5	5	5	5	5	5	5	5	5	5	63
345	2	2	1	2	1	2	2	1	1	1	5	5	5	5	5	5	4	4	4	4	4	4	54	3	3	3	3	3	3	3	3	24	4	4	4	5	5	4	4	4	4	4	4	5	4	55
346	2	2	1	2	1	2	1	1	1	1	2	3	3	3	3	3	3	2	3	3	3	3	34	3	3	3	3	3	3	3	3	24	4	4	4	5	4	4	4	5	5	5	4	4	4	56
347	1	3	1	2	2	3	2	1	1	1	4	4	4	4	4	4	4	4	4	4	4	4	48	4	4	4	2	3	3	3	3	26	3	5	5	4	5	5	5	5	4	5	5	5	5	61
348	2	3	1	2	2	3	2	2	1	1	4	4	4	4	4	4	4	4	4	4	4	4	48	4	4	4	4	3	4	4	4	31	4	4	4	5	4	4	4	5	4	4	4	4	4	54
349	1	2	1	2	1	2	2	1	1	1	5	4	4	4	4	5	4	4	5	5	4	4	52	4	4	4	3	4	4	4	4	31	4	4	4	5	5	4	4	5	4	4	5	5	4	57
350	2	2	1	2	1	1	2	1	1	1	5	5	5	5	5	5	5	4	4	4	4	4	55	4	4	4	5	5	4	4	4	34	3	5	5	5	5	5	5	5	5	5	4	5	5	62
351	2	2	1	2	2	3	1	4	1	1	4	4	4	4	4	4	4	4	4	4	4	4	48	3	3	3	2	3	3	3	3	23	4	5	5	4	5	4	4	5	5	5	5	5	4	60
352	2	2	1	2	1	1	1	1	1	1	4	5	4	4	4	4	4	4	4	4	4	4	49	2	5	5	4	3	3	4	4	30	4	5	5	4	5	4	4	4	4	4	4	5	4	56
353	2	3	1	2	2	3	2	1	1	2	3	3	3	3	3	3	3	3	3	3	3	3	36	3	4	3	3	3	3	3	3	25	4	4	4	5	4	4	4	5	5	4	4	4	4	55
354	2	2	1	2	2	3	1	1	1	2	4	4	4	4	4	4	4	4	4	3	4	4	47	4	4	3	3	3	4	3	3	27	3	5	4	5	5	4	4	5	5	5	5	5	4	59
355	2	3	1	2	2	3	2	1	1	1	4	4	4	4	4	4	4	4	4	4	4	4	48	4	4	4	4	3	3	4	3	29	4	5	5	5	5	5	4	5	4	5	4	5	4	60
356	2	3	2	2	2	3	2	1	1	1	5	5	5	5	3	4	4	4	4	5	4	5	53	3	3	3	2	2	3	3	2	21	3	5	4	5	5	4	4	5	5	5	5	5	4	59
357	2	2	1	2	2	2	2	1	1	1	5	5	5	5	5	5	5	5	5	5	5	5	60	5	5	5	5	5	5	5	5	40	4	4	4	5	5	4	5	5	4	5	4	5	5	59
358	2	2	2	1	1	2	2	1	1	1	4	4	4	4	4	4	4	4	4	4	4	4	48	4	4	4	4	4	4	4	4	32	3	5	5	5	5	4	5	5	5	5	5	5	5	62
359	2	2	1	3	1	2	2	1	1	1	5	5	5	5	5	5	5	5	5	5	5	5	60	4	4	4	3	4	3	3	3	28	4	5	5	4	5	4	4	5	5	5	5	5	4	60
360	2	2	1	2	2	2	1	1	1	1	4	4	4	4	4	4	4	4	4	4	4	4	48	4	4	4	1	4	4	4	4	29	4	5	5	5	5	4	4	4	4	4	4	5	4	57
361	1	2	2	1	1	1	2	1	1	2	3	5	4	5	5	5	3	3	3	5	4	4	49	3	5	4	2	3	3	4	3	27	3	5	5	5	5	4	5	5	5	5	4	5	5	61
362	2	2	1	2	2	2	2	1	1	1	4	4	4	4	4	4	4	4	4	4	4	4	48	5	5	5	5	5	3	5	5	39	4	5	5	4	5	4	5	5	4	5	4	5	5	60
363	2	1	2	1	1	1	1	1	1	2	3	3	4	3	4	4	2	3	3	3	3	3	38	3	3	3	1	2	2	3	3	20	3	5	5	5	5	5	5	5	5	5	5	5	5	63
364	1	3	1	2	2	3	1	1	1	1	4	4	4	4	4	4	4	4	4	4	4	4	48	3	3	3	3	3	3	3	3	24	3	5	5	5	5	5	5	4	4	5	4	5	5	60
365	2	2	1	2	1	1	2	2	1	2	3	3	3	3	3	3	3	3	3	3	3	3	36	3	3	3	3	3	3	3	3	24	3	5	5	5	5	4	5	5	5	5	4	5	5	61
366	1	3	1	2	2	3	1	4	1	2	3	3	3	3	3	3	3	3	3	3	3	3	36	3	3	3	3	3	3	3	3	24	3	5	5	5	5	5	5	5	5	5	5	5	5	63
367	2	2	1	2	2	2	2	1	1	1	4	4	4	4	4	4	4	4	4	4	4	4	48	4	4	4	5	4	4	4	4	33	3	5	5	5	5	5	5	5	5	5	5	5	5	63
368	2	2	2	3	1	1	2	4	1	1	3	4	4	3	4	4	4	4	4	4	4	4	46	3	4	3	3	3	3	3	3	25	3	5	5	5	5	4	4	5	4	5	4	5	4	58
369	2	3	1	2	2	3	2	1	1	1	3	3	3	3	3	3	3	3	3	3	3	3	36	3	3	3	5	5	3	5	3	30	4	4	4	3	3	4	4	3	4	3	4	5	4	49
370	2	2	1	2	1	2	1	1	1	2	3	3	3	3	3	3	3	3	3	3	3	3	36	3	3	3	2	2	2	3	2	20	4	4	4	4	4	4	4	4	4	4	4	4	4	52
371	2	3	1	1	1	3	2	1	1	1	4	4	4	4	4	4	4	4	4	4	4	4	48	4	3	5	3	4	4	4	4	31	4	3	3	3	3	3	3	3	3	3	3	5	4	43
372	1	1	2	1	1	1	2	4	1	1	1	1	1	1	1	1	1	1	1	1	1	1	12	3	3	3	3	1	3	3	3	22	4	3	3	4	3	4	4	3	4	4	3	5	4	48
373	1	3	1	2	2	3	2	1	1	1	2	4	4	4	4	4	4	4	4	4	4	4	46	2	2	3	3	2	2	3	2	19	3	3	3	4	3	3	3	3	3	3	3	5	4	43
374	1	1	2	2	1	1	2	1	1	2	4	4	4	4	4	4	4	3	4	4	4	4	47	4	4	4	4	4	4	4	4	32	4	3	3	3	3	4	4	3	4	3	4	5	4	47
375	1	2	1	2	2	2	2	1	1	2	5	5	5	5	5	5	5	5	5	5	5	5	60	2	5	4	2	4	4	3	3	27	4	3	3	3	3	4	4	3	4	3	3	5	4	46
376	1	3	1	2	2	3	2	2	1	2	4	3	3	4	4	4	3	4	4	4	4	4	45	4	4	4	2	3	3	4	4	28	3	3	3	4	3	3	3	3	3	3	4	5	4	44
377	1	2	2	2	1	1	2	1	1	1	2	3	3	2	2	3	4	3	3	3	2	3	33	2	2	2	1	2	2	1	1	13	3	3	3	4	3	3	3	4	3	3	3	5	4	44
378	2	3	3	2	2	3	2	2	1	1	4	4	4	4	4	4	4	4	4	4	4	4	48	3	3	3	1	3	2	3	3	21	4	4	4	4	3	3	3	4	4	3	4	5	4	49
379	1	3	1	2	1	3	2	1	1	1	4	4	4	4	4	4	4	4	4	4	4	4	48	4	4	4	3	3	4	4	4	30	3	3	3	3	3	3	3	3	3	3	3	5	4	42
380	1	1	2	2	1	1	1	1	1	2	3	3	3	4	4	4	3	3	3	4	4	3	41	5	5	4	5	5	5	5	5	39	3	3	3	4	3	3	3	3	3	3	3	5	4	43
381	1	2	1	2	1	2	2	1	1	1	2	3	3	3	3	3	3	3	3	3	2	2	33	4	2	2	2	1	2	2	2	17	4	3	3	3	3	3	3	3	3	3	3	5	4	43
382	1	3	1	2	2	3	2	1	1	1	5	5	5	5	5	5	5	5	5	5	5	5	60	5	5	5	5	5	5	5	5	40	3	3	3	3	3	3	3	3	4	3	3	5	4	43
383	2	3	1	2	2	3	2	1	1	2	3	3	3	3	3	3	3	3	3	3	3	3	36	3	3	3	3	3	3	3	3	24	3	3	3	4	4	3	3	3	3	3	3	4	4	43
384	1	2	2	2	1	2	1	1	1	1	5	5	5	5	5	5	5	5	5	5	5	5	60	4	4	4	4	4	3	3	4	30	4	3	4	3	3	4	4	3	3	4	4	5	4	48
385	1	3	1	2	2	3	2	1	1	1	3	3	3	3	3	3	3	3	3	3	3	3	36	3	3	3	3	3	3	3	3	24	4	3	3	3	3	4	4	4	4	3	4	5	4	48
386	1	1	2	1	1	1	2	1	1	1	5	5	5	5	5	5	5	5	5	5	5	5	60	4	4	4	4	5	4	4	4	33	4	4	4	4	4	4	4	4	4	4	4	4	4	52
387	2	2	2	2	1	1	1	1	1	1	4	4	4	4	4	4	4	4	4	4	4	4	48	3	3	3	3	3	2	4	4	25	4	4	4	3	3	4	4	4	4	4	4	5	4	51
388	2	1	2	2	1	1	2	1	1	1	5	5	5	4	4	4	4	4	4	4	4	4	51	4	4	4	4	4	4	4	4	32	3	3	3	3	3	4	3	3	3	3	3	5	4	43
389	2	1	2	2	1	1	2	1	1	1	4	4	4	5	4	4	4	4	4	4	4	4	49	4	4	4	4	4	4	4	4	32	4	4	4	4	3	3	4	4	4	4	4	5	4	51
390	2	1	2	2	1	1	2	1	1	1	4	4	4	4	4	4	4	4	4	4	4	4	48	3	3	3	3	3	3	3	3	24	4	3	3	4	4	4	3	3	4	3	3	4	4	46
391	2	3	1	2	2	3	2	4	1	2	4	3	3	4	3	3	4	3	3	3	3	3	39	3	3	3	3	3	2	3	3	23	3	3	3	3	3	4	4	4	3	4	4	5	4	47
392	2	3	1	2	2	3	1	3	1	1	4	5	4	5	5	5	4	5	4	4	4	4	53	4	4	4	5	4	4	4	4	33	4	4	4	3	3	4	4	3	3	3	4	5	4	48
393	1	1	2	1	1	1	1	1	1	1	5	5	5	5	5	5	5	5	5	5	5	5	60	5	5	5	5	5	5	5	5	40	3	4	3	4	3	3	3	3	3	3	4	5	4	45
394	2	2	1	2	1	1	1	1	1	1	5	5	5	5	5	5	5	5	5	5	5	5	60	5	5	5	5	5	5	5	5	40	3	3	3	3	3	4	4	3	3	3	4	5	4	45
395	2	2	2	2	2	3	1	1	1	2	4	4	4	4	3	4	3	3	3	3	3	3	41	3	3	3	1	3	3	3	3	22	4	3	3	3	3	4	3	3	3	3	4	5	4	45
396	2	2	1	2	2	2	1	2	1	1	5	4	4	5	4	4	4	4	4	4	4	4	50	4	4	4	3	4	4	4	4	31	4	4	4	3	4	4	4	3	4	4	4	4	4	50
397	2	2	2	2	1	1	2	1	1	2	4	5	4	5	4	4	4	4	3	4	4	5	50	3	3	4	2	3	2	4	2	23	3	3	3	3	3	4	3	3	4	3	3	5	4	44
398	1	1	2	1	1	1	2	1	1	1	5	4	4	5	5	5	3	4	4	4	4	3	50	4	4	3	2	3	3	4	2	25	3	4	4	3	4	4	4	4	4	4	4	4	4	50
399	1	1	2	1	1	1	2	1	1	1	3	3	3	3	3	3	3	3	3	3	3	3	36	3	3	3	3	3	3	3	3	24	4	4	4	4	4	4	4	4	4	4	4	4	4	52
400	2	3	1	2	2	3	1	1	1	1	5	5	5	5	4	5	5	5	5	5	5	4	58	5	5	5	3	4	4	5	4	35	4	3	3	3	4	4	3	3	4	3	3	4	4	45
401	1	2	1	2	1	2	2	1	1	1	4	4	4	4	4	4	4	4	4	4	4	4	48	4	4	4	4	4	4	4	4	32	3	3	3	4	3	3	3	3	3	3	3	5	4	43
402	2	2	2	2	1	1	1	1	1	2	3	4	4	4	3	4	4	4	4	4	3	4	45	4	4	4	2	3	3	3	3	26	4	3	3	3	3	3	3	3	3	3	3	5	4	43
403	2	1	2	2	1	1	2	1	1	1	5	5	5	5	4	4	5	5	4	5	5	5	57	3	4	4	2	2	2	4	4	25	4	3	4	4	4	4	4	3	4	3	4	4	4	49
404	2	2	2	2	2	2	2	1	1	1	3	4	4	4	3	3	5	5	4	4	4	4	47	3	3	3	3	3	3	3	3	24	5	3	3	3	3	4	3	3	3	3	4	5	4	46
405	2	3	1	3	2	2	2	3	1	1	4	4	4	5	4	4	3	3	4	3	4	3	45	4	4	4	3	4	4	5	4	32	3	3	3	3	3	3	3	3	3	3	3	5	4	42
406	1	2	1	2	2	3	2	1	1	2	3	4	4	4	3	3	3	3	4	3	3	3	40	4	4	3	5	2	3	3	3	27	3	3	3	4	3	4	4	4	4	3	4	5	4	48
407	1	1	2	1	1	1	2	1	1	1	5	5	5	5	5	5	5	5	5	5	5	5	60	5	5	5	5	5	5	4	5	39	3	3	3	3	3	3	4	3	3	3	3	5	4	43
408	2	3	1	2	2	3	1	3	1	1	5	5	5	5	5	5	3	5	5	5	5	5	58	4	4	4	4	4	4	4	4	32	3	3	3	3	3	4	4	3	3	3	4	5	4	45
409	2	2	2	2	1	1	1	1	1	1	4	4	4	4	4	4	4	4	4	4	4	4	48	4	4	3	3	3	3	4	4	28	4	3	3	3	3	4	4	3	4	4	4	5	4	48
410	2	1	2	1	1	1	2	1	1	2	4	5	4	4	4	4	4	5	4	4	4	4	50	4	4	4	4	4	4	4	3	31	3	3	3	4	3	3	3	4	3	3	3	5	4	44
411	2	3	1	2	2	3	2	1	1	1	5	5	4	5	5	5	5	5	5	5	5	5	59	4	4	4	4	4	4	4	4	32	3	3	3	4	3	3	3	3	3	3	3	5	4	43
412	2	2	1	2	1	2	2	2	1	1	2	3	3	3	3	3	3	3	3	3	4	4	37	3	3	3	1	3	2	2	2	19	4	4	4	3	3	4	4	4	4	4	4	5	4	51
413	1	2	1	2	1	2	2	1	1	1	3	3	3	3	3	3	3	3	3	3	3	3	36	3	3	3	3	3	3	3	3	24	3	4	4	3	3	4	3	3	4	3	4	5	4	47
414	2	2	1	2	2	3	1	2	1	1	5	5	5	5	5	5	5	5	5	5	5	5	60	5	5	5	5	5	5	5	5	40	4	4	4	4	3	3	4	4	4	4	4	5	4	51
415	1	2	1	2	1	2	2	1	1	2	3	4	3	4	4	3	4	3	4	3	4	3	42	4	4	4	5	4	5	4	4	34	4	4	4	3	3	4	4	4	4	3	4	5	4	50
416	1	1	2	1	1	1	2	1	1	2	3	3	4	4	4	4	4	4	4	4	4	4	46	4	4	3	3	3	3	3	3	26	4	4	4	4	4	4	4	4	4	4	4	4	4	52
417	2	2	1	2	2	3	2	2	1	1	4	4	4	4	4	4	4	4	4	4	4	4	48	3	4	4	2	3	3	3	3	25	3	4	4	3	3	3	3	3	3	3	3	5	4	44
418	2	3	1	2	2	3	1	2	1	2	4	4	4	4	4	4	4	4	4	4	4	4	48	4	4	4	4	4	4	4	4	32	4	4	4	3	3	4	3	3	3	4	4	5	4	48
419	1	1	2	2	1	1	1	1	1	1	5	5	5	5	5	5	5	5	5	5	5	5	60	5	5	5	5	5	5	5	5	40	4	4	4	3	4	4	4	4	3	4	4	4	4	50
420	1	2	2	2	1	1	2	1	1	2	5	4	4	4	4	4	4	4	4	4	4	4	49	3	4	4	3	4	3	4	4	29	3	4	3	3	3	4	4	4	4	4	4	5	4	49
421	2	3	1	2	2	3	1	4	1	1	4	4	4	4	3	3	4	4	4	4	4	4	46	3	4	3	2	3	2	3	3	23	4	3	3	3	3	3	3	3	3	3	3	5	4	43
422	2	2	1	1	1	2	2	1	1	1	5	5	5	5	5	5	5	5	5	5	5	5	60	5	5	5	5	5	5	5	5	40	4	4	4	4	4	4	4	4	3	4	4	4	4	51
423	2	2	2	2	2	2	2	1	1	2	4	4	4	4	4	4	4	4	4	4	4	4	48	4	4	4	4	4	4	4	4	32	3	3	3	4	3	3	3	3	3	3	3	5	4	43
424	1	2	2	2	1	1	2	1	1	1	4	4	4	4	4	4	4	4	4	4	4	4	48	4	4	4	4	4	4	4	4	32	4	4	4	4	4	4	4	4	4	4	4	4	4	52
425	2	2	1	2	1	2	2	1	1	2	1	4	4	4	4	4	4	4	4	4	4	4	45	3	4	4	2	3	4	2	3	25	3	3	3	3	3	4	4	4	3	3	4	5	4	46
426	1	2	1	2	2	2	2	1	1	1	5	5	5	5	4	5	5	5	5	5	5	5	59	5	5	5	5	5	5	5	5	40	4	3	3	3	3	4	4	4	4	4	4	5	4	49
427	2	2	2	2	1	1	2	1	1	1	4	4	4	4	4	4	4	4	4	4	4	4	48	4	4	4	4	4	4	4	4	32	3	3	4	3	3	3	3	3	3	3	3	5	4	43
428	1	2	1	2	1	2	1	1	1	1	4	4	4	4	4	4	4	4	4	4	4	4	48	4	3	3	3	3	3	3	3	25	3	3	3	3	3	3	3	3	3	3	3	5	4	42
429	2	3	1	2	2	3	1	1	1	1	5	5	5	5	5	4	4	5	5	4	5	5	57	4	4	4	4	4	4	5	5	34	3	3	3	4	3	3	3	3	3	3	3	5	4	43
430	1	3	1	2	2	3	2	1	1	1	5	5	5	5	5	5	5	5	5	5	5	5	60	2	2	5	5	2	5	2	2	25	3	3	3	4	4	4	3	3	3	3	3	4	4	44
431	1	3	1	2	2	3	1	1	1	1	4	4	4	4	4	5	4	4	4	4	4	4	49	4	3	4	3	4	4	4	4	30	4	3	3	4	3	4	3	3	3	3	3	5	4	45
432	2	3	1	2	2	3	2	1	1	1	4	4	4	3	4	4	3	3	3	3	3	4	42	3	4	3	5	3	3	3	3	27	4	3	3	3	3	4	4	3	3	3	4	5	4	46
433	2	3	1	2	2	3	2	2	1	2	3	3	3	3	3	3	3	3	3	3	3	3	36	4	3	3	4	3	5	4	3	29	3	3	3	3	3	4	3	4	4	3	3	5	4	45
434	2	3	1	2	2	3	2	2	1	1	5	5	5	5	5	5	4	5	5	5	4	5	58	4	4	4	3	4	4	4	4	31	4	4	4	3	4	4	4	3	3	3	4	4	4	48
435	2	3	1	2	2	3	2	1	1	2	3	3	3	3	3	3	3	3	3	3	3	3	36	3	3	3	5	3	3	3	3	26	3	3	3	4	3	4	4	3	4	3	4	5	4	47
436	2	2	1	2	1	1	2	1	1	2	4	4	3	4	4	4	4	4	3	3	4	4	45	3	3	3	3	3	3	3	3	24	3	3	3	4	3	4	4	3	3	3	4	5	4	46
437	2	3	1	2	1	3	2	1	1	2	4	4	4	4	4	4	4	4	4	4	3	4	47	4	4	4	4	4	4	4	4	32	3	3	3	3	3	3	3	3	3	3	4	5	4	43
438	2	1	2	2	1	1	2	1	1	1	4	4	4	4	4	4	4	4	4	4	4	4	48	4	4	4	4	4	4	4	4	32	3	3	3	3	3	4	3	3	3	3	4	5	4	44
439	1	2	1	2	1	2	1	2	1	1	5	5	5	5	5	5	5	5	5	5	5	5	60	5	5	5	5	5	5	5	5	40	4	4	4	3	3	3	3	3	3	3	3	5	4	45
440	2	1	2	2	1	1	2	4	1	2	4	4	4	4	4	4	4	3	4	4	4	4	47	3	4	3	2	3	3	3	4	25	4	3	3	3	3	3	3	3	3	4	3	5	4	44
441	2	2	2	2	1	1	2	1	1	2	4	3	4	4	4	4	4	4	4	4	4	4	47	5	5	5	5	5	4	4	5	38	3	3	3	3	3	3	3	4	4	3	3	5	4	44
442	2	2	2	2	1	1	2	4	1	2	3	3	3	4	4	4	4	4	4	4	4	5	46	3	3	4	4	4	3	3	4	28	3	3	3	3	3	4	3	3	3	3	3	5	4	43
443	2	3	1	2	2	3	2	1	1	2	3	3	3	3	3	3	3	3	3	3	3	3	36	3	3	3	3	3	3	3	3	24	3	3	3	3	3	3	3	4	4	3	3	5	4	44
444	2	2	2	2	1	1	2	1	1	1	3	3	4	4	4	4	4	5	5	5	4	4	49	4	4	3	2	2	5	3	3	26	4	4	4	3	3	4	4	4	3	3	4	5	4	49
445	2	4	1	2	2	3	2	1	1	1	4	4	4	4	4	4	3	4	3	4	4	3	45	3	4	3	5	3	5	5	3	31	3	3	3	3	3	4	3	3	3	3	4	5	4	44
446	1	2	1	2	1	2	1	2	1	2	3	3	3	4	3	4	3	3	3	3	3	3	38	2	2	2	2	2	2	2	2	16	3	3	3	3	3	3	4	3	3	3	3	5	4	43
447	1	2	1	2	2	2	2	1	1	1	4	4	4	4	4	4	4	4	4	4	4	4	48	4	4	4	4	4	4	4	4	32	3	3	3	4	3	3	3	3	3	3	3	5	4	43
448	2	2	2	2	1	1	2	1	1	1	4	4	4	4	4	4	4	4	4	4	4	4	48	4	3	3	3	3	3	3	3	25	4	4	4	4	3	4	4	4	4	4	4	5	4	52
449	2	2	1	2	2	3	2	2	1	2	3	3	3	3	3	3	3	3	3	3	3	3	36	2	2	2	2	2	2	2	2	16	4	3	3	4	3	3	3	3	3	3	3	5	4	44
450	1	1	2	2	1	1	2	1	1	1	4	4	4	3	4	3	4	3	3	3	4	4	43	4	3	3	4	4	4	4	2	28	3	3	3	4	3	4	3	3	3	3	3	5	4	44
451	1	2	2	2	1	1	1	1	1	1	3	3	4	4	4	2	4	3	3	3	3	4	40	2	5	2	4	2	5	5	2	27	3	3	3	3	3	3	3	3	3	3	3	5	4	42
452	2	1	2	2	1	1	1	1	1	2	4	4	4	4	4	4	4	4	4	4	4	4	48	4	4	4	4	4	4	4	4	32	4	3	3	3	3	3	3	3	3	3	3	5	4	43
453	1	2	1	2	2	3	2	4	1	2	3	2	2	2	2	3	3	2	2	3	2	2	28	3	3	3	2	2	2	3	3	21	4	3	4	4	3	4	4	3	3	3	3	5	4	47
454	2	2	1	2	3	3	2	1	1	1	4	4	1	4	4	4	4	4	3	4	4	3	43	2	3	3	2	2	2	2	2	18	4	3	3	4	3	4	4	3	3	3	4	5	4	47
455	2	2	1	2	1	2	2	1	1	2	3	3	3	3	3	3	3	3	3	3	3	3	36	3	3	3	3	3	3	3	3	24	4	3	4	3	4	4	4	4	3	3	4	4	4	48
456	2	2	1	2	1	1	1	1	1	2	4	4	4	4	4	4	4	4	4	4	4	4	48	4	4	4	4	4	3	3	3	29	3	3	3	4	3	3	3	3	3	3	3	5	4	43
457	2	3	1	2	2	3	2	1	1	2	3	3	3	4	3	3	2	4	3	4	4	3	39	4	3	4	2	4	2	2	2	23	3	3	3	3	3	3	4	3	3	3	3	5	4	43
458	2	3	1	3	2	3	1	2	1	1	3	4	4	4	4	4	4	4	4	4	4	4	47	3	3	3	3	3	3	3	3	24	3	4	3	4	3	4	3	3	3	3	4	5	4	46
459	2	2	2	2	1	1	2	1	1	1	4	4	4	4	4	4	4	4	4	4	4	4	48	4	4	4	2	4	4	4	4	30	3	3	3	3	3	3	3	3	3	3	3	5	4	42
460	1	2	1	2	1	2	1	1	1	1	4	4	4	4	4	4	4	4	4	4	4	4	48	3	3	3	3	3	3	3	3	24	4	4	3	3	3	4	4	4	4	4	4	5	4	50
461	2	2	2	2	1	1	2	1	1	1	4	4	4	4	3	3	4	4	4	4	4	4	46	4	3	4	4	4	3	3	3	28	3	3	3	4	3	3	3	3	3	3	3	5	4	43
462	2	1	1	2	1	1	1	1	1	1	5	4	4	4	2	3	4	4	4	4	3	4	45	3	4	3	4	4	4	3	4	29	4	3	3	3	3	4	3	4	3	3	4	5	4	46
463	2	2	2	2	1	1	2	1	1	1	4	4	4	4	3	3	3	3	3	3	3	3	40	3	3	3	2	2	2	2	2	19	4	3	4	3	3	4	3	4	4	4	3	5	4	48
464	2	1	2	2	1	1	1	1	1	2	4	4	4	4	4	4	4	4	4	4	4	4	48	4	4	4	4	4	4	4	4	32	4	4	3	3	3	4	3	3	4	4	4	5	4	48
465	2	1	2	2	1	1	2	1	1	1	3	4	4	4	3	4	5	4	4	5	5	5	50	3	4	4	3	3	4	4	3	28	4	3	3	4	3	3	4	3	3	3	3	5	4	45
466	1	1	2	2	1	1	2	1	1	1	5	5	5	4	5	4	5	5	5	5	5	5	58	5	5	5	5	4	5	5	4	38	4	4	4	3	3	4	4	4	4	4	4	5	4	51
467	2	2	1	2	1	1	2	4	1	1	4	4	4	4	4	4	4	4	4	4	4	4	48	4	5	5	4	4	4	3	4	33	4	3	3	4	3	3	3	3	3	3	3	5	4	44
468	1	2	1	2	1	1	2	1	2	1	5	5	5	5	5	4	4	4	4	4	4	4	53	4	4	4	4	4	4	4	4	32	3	3	3	4	3	3	3	3	3	3	3	5	4	43
469	2	2	2	2	1	2	2	4	1	1	4	4	4	4	5	4	4	4	4	4	4	4	49	4	4	4	4	4	4	4	4	32	4	4	4	4	4	4	4	4	4	4	4	4	4	52
470	1	1	2	2	1	1	1	1	1	1	3	3	3	4	1	1	4	5	5	5	5	4	43	5	5	5	1	4	5	3	3	31	4	4	4	4	3	4	4	3	3	3	4	5	4	49
471	1	3	1	2	2	3	1	2	1	1	5	5	5	5	5	5	5	5	5	5	5	5	60	3	3	3	3	3	3	3	3	24	4	4	4	4	3	4	4	4	4	4	4	5	4	52
472	2	3	1	2	2	3	2	4	1	1	4	4	4	4	4	4	3	4	4	4	4	4	47	4	3	3	5	3	5	3	5	31	4	3	3	4	3	4	4	3	4	3	4	5	4	48
473	2	3	1	2	2	3	2	2	1	2	3	3	3	3	3	3	3	3	3	3	3	3	36	3	3	3	3	3	3	3	3	24	4	3	3	3	3	3	3	3	3	3	3	5	4	43
474	2	1	2	2	1	1	2	1	1	1	4	5	5	5	4	4	4	4	4	4	4	4	51	4	5	5	3	5	3	5	3	33	4	3	3	3	3	4	4	3	3	3	4	5	4	46
475	2	3	3	2	2	3	2	2	1	1	4	3	4	4	4	4	4	4	4	4	4	4	47	3	4	3	5	3	4	3	3	28	3	3	3	4	3	3	3	3	3	3	3	5	4	43
476	2	1	2	2	1	1	2	1	1	2	4	4	4	3	3	4	4	4	4	4	4	4	46	3	5	3	5	3	4	5	3	31	3	3	3	3	3	4	4	3	3	3	3	5	4	44
477	2	2	1	2	2	2	2	1	1	1	4	4	4	4	4	4	4	4	4	4	4	4	48	4	3	4	3	4	4	4	4	30	3	4	4	3	3	4	4	4	4	4	4	5	4	50
478	1	2	2	2	1	1	1	1	1	2	3	3	3	3	3	3	3	3	3	3	3	3	36	3	3	5	3	5	3	4	3	29	3	3	3	4	3	3	3	3	3	3	3	5	4	43
479	1	2	1	3	2	3	2	4	1	2	4	4	5	4	4	5	4	4	5	5	4	5	53	4	4	5	5	4	4	4	4	34	3	3	3	3	3	3	3	3	3	3	3	5	4	42
480	1	2	1	2	1	2	2	1	1	1	5	5	5	5	5	5	5	5	5	5	5	5	60	5	5	5	3	5	5	5	3	36	4	4	4	3	4	4	4	3	3	3	3	4	4	47
481	2	2	1	2	2	2	2	1	1	1	3	3	3	3	3	3	3	3	3	3	3	3	36	3	5	4	3	4	5	3	5	32	3	3	3	4	3	4	3	3	3	3	3	5	4	44
482	2	2	1	2	2	2	2	1	1	1	5	4	4	4	4	5	4	4	4	4	4	4	50	3	5	3	4	3	3	5	3	29	3	3	3	3	3	3	3	3	3	3	3	5	4	42
483	2	3	1	2	2	3	2	1	1	2	3	3	3	3	4	3	3	3	3	3	3	3	37	2	2	5	2	3	5	3	3	25	3	3	3	4	3	3	3	3	3	3	3	5	4	43
484	1	2	1	2	2	2	2	1	1	1	3	3	4	3	4	4	4	3	3	3	3	3	40	3	5	3	5	3	4	3	3	29	3	3	3	3	3	3	3	3	3	3	3	5	4	42
485	2	1	2	2	1	1	2	1	1	1	4	4	4	4	3	4	4	4	4	4	4	4	47	3	4	3	4	4	4	4	3	29	3	3	3	3	3	3	3	3	3	3	3	5	4	42
486	2	2	1	2	1	1	1	4	1	1	5	5	5	5	5	5	5	5	5	5	5	5	60	5	5	5	5	3	4	5	2	34	4	3	3	3	3	3	4	3	3	3	3	5	4	44
487	2	2	2	2	1	1	1	1	1	2	4	4	4	4	5	5	3	4	4	4	5	3	49	5	4	4	5	4	4	4	4	34	3	3	3	3	3	3	3	3	3	3	3	5	4	42
488	2	1	2	2	1	1	2	1	1	2	4	4	4	4	4	4	4	4	4	4	4	4	48	3	4	4	4	4	4	4	4	31	3	4	4	3	3	4	4	3	3	3	3	5	4	46
489	2	2	1	2	2	2	1	1	1	2	4	4	4	4	4	4	4	4	4	4	4	4	48	4	3	3	3	3	3	3	3	25	4	3	3	4	3	4	3	3	3	3	3	5	4	45
490	2	2	2	2	1	1	2	1	1	2	4	4	4	4	4	4	4	4	4	4	4	4	48	4	4	4	3	4	3	3	4	29	3	3	3	3	3	3	3	3	3	3	3	5	4	42
491	2	2	2	2	1	1	2	1	1	1	4	4	4	4	4	4	4	4	4	4	4	4	48	4	3	3	4	3	3	4	4	28	4	4	4	4	3	4	4	3	3	3	4	5	4	49
492	1	3	1	2	2	3	1	2	1	2	3	4	3	3	3	3	4	3	3	3	3	3	38	2	2	2	2	2	2	2	2	16	3	3	3	4	3	4	3	3	3	3	3	5	4	44
493	1	2	1	2	2	3	2	1	1	1	5	5	5	5	5	5	5	5	5	5	5	5	60	5	4	4	4	4	4	4	4	33	3	3	3	3	3	4	4	3	3	3	3	5	4	44
494	2	2	1	2	1	2	2	1	1	2	4	4	4	4	3	3	3	3	3	3	3	3	40	3	4	3	4	2	5	4	4	29	3	3	3	4	3	3	3	3	3	3	3	5	4	43
495	2	2	2	2	1	1	1	1	1	1	5	5	5	5	4	4	5	4	4	4	3	3	51	4	4	4	3	3	3	4	4	29	3	3	3	3	3	3	4	3	4	3	4	5	4	45
496	2	1	2	2	1	1	1	1	1	1	3	2	2	4	3	3	2	2	2	2	2	2	29	5	3	3	2	2	5	2	4	26	4	4	4	4	4	4	4	4	4	4	3	4	4	51
497	2	2	2	2	1	1	2	1	1	1	4	4	4	4	4	4	4	4	4	4	4	4	48	3	5	4	4	4	3	4	4	31	3	3	3	3	3	3	4	3	4	3	3	5	4	44
498	2	2	1	2	1	2	2	1	1	1	4	4	4	4	4	4	4	4	4	4	4	4	48	3	5	3	5	3	5	5	5	34	4	4	4	3	4	4	4	4	4	4	4	4	4	51
499	2	3	1	3	2	3	2	4	1	1	1	4	4	4	4	4	4	4	4	4	4	4	45	4	3	3	2	4	4	4	4	28	3	3	3	3	3	3	3	3	3	3	3	5	4	42
500	1	1	2	1	1	2	2	1	1	1	5	5	5	5	5	5	5	5	5	5	5	5	60	5	5	5	5	5	5	5	5	40	3	3	3	3	3	3	3	3	3	3	3	5	4	42
501	1	2	1	2	1	1	2	1	1	1	4	4	4	4	4	4	4	4	4	4	4	4	48	4	4	4	3	3	4	3	3	28	4	3	3	3	3	4	4	3	4	3	4	5	4	47
502	1	2	2	1	1	1	2	1	1	1	3	1	5	5	5	5	5	5	5	5	5	5	54	5	5	5	5	5	5	5	5	40	4	3	3	4	3	3	3	3	3	3	3	5	4	44
503	2	2	2	2	1	1	2	1	1	2	4	4	4	4	3	4	4	4	3	4	4	4	46	3	5	5	4	4	4	4	4	33	4	4	4	3	4	4	4	4	4	4	4	4	4	51
504	2	2	1	2	2	2	2	1	1	2	4	4	4	5	3	4	3	3	4	4	4	3	45	3	3	4	4	4	3	4	5	30	3	3	4	4	3	3	3	3	4	3	4	5	4	46
505	2	2	2	3	1	1	2	1	1	2	5	5	5	5	4	4	5	5	5	5	5	5	58	3	4	4	3	3	4	4	3	28	3	3	3	4	3	3	3	3	3	3	3	5	4	43
506	2	3	1	2	2	2	2	1	1	2	2	2	4	4	3	3	3	3	4	3	4	4	39	5	5	5	5	4	5	5	4	38	4	4	4	3	4	4	4	4	4	4	4	4	4	51
507	2	2	2	3	1	1	2	3	1	2	3	4	4	4	4	4	3	3	3	3	4	3	42	4	4	4	4	5	5	5	5	36	4	4	4	4	4	4	4	4	4	4	4	4	4	52
508	1	1	2	2	1	1	2	1	1	2	5	3	3	5	5	5	4	5	4	5	4	4	52	5	5	4	5	4	5	5	5	38	3	3	3	3	3	4	4	3	4	3	3	5	4	45
509	2	3	1	2	2	3	2	2	1	1	5	5	5	5	5	5	5	5	5	5	5	5	60	5	5	5	5	5	5	5	5	40	4	4	4	4	4	4	4	4	4	4	4	4	4	52
510	1	2	2	3	1	1	2	3	1	2	5	4	4	5	5	4	3	3	4	3	4	4	48	3	4	4	3	3	4	4	3	28	3	4	4	3	4	4	4	4	4	4	4	4	4	50
511	2	2	2	1	1	1	2	2	1	2	4	3	3	4	4	3	4	4	3	4	3	4	43	5	5	5	5	4	5	5	4	38	4	3	3	3	3	4	4	3	4	4	3	5	4	47
512	2	1	2	2	1	1	2	1	1	1	4	4	4	4	4	4	4	4	4	4	4	4	48	4	5	5	4	4	4	3	4	33	4	3	4	3	3	3	3	4	3	3	4	5	4	46
513	2	2	1	2	1	1	2	2	1	1	4	4	4	4	4	4	4	4	4	4	4	4	48	4	4	4	4	4	4	4	4	32	3	3	3	3	3	3	3	3	3	3	3	5	4	42
514	2	2	2	1	1	1	2	1	1	1	4	4	4	4	4	4	4	4	4	4	3	4	47	4	4	4	4	4	4	4	4	32	3	4	4	3	4	4	4	4	4	4	4	4	4	50
515	2	3	1	2	2	3	2	1	1	1	4	4	4	4	4	4	4	4	4	4	4	4	48	5	5	5	5	4	5	3	3	35	4	4	4	3	3	4	4	3	3	3	3	5	4	47
516	2	2	1	2	2	3	2	1	1	1	4	4	4	5	4	5	4	4	4	4	4	4	50	3	3	3	3	3	3	3	3	24	3	4	4	3	4	4	4	3	3	4	4	4	4	48
517	2	2	1	2	2	3	2	1	2	2	5	5	5	5	5	5	4	4	4	4	4	4	54	4	3	3	5	3	5	3	5	31	3	3	3	4	3	3	3	3	3	3	3	5	4	43
518	2	2	1	2	1	2	2	1	2	1	1	4	4	4	4	4	4	4	4	4	4	4	45	5	5	5	4	5	5	5	4	38	3	3	4	3	3	4	3	3	3	3	3	5	4	44
519	2	4	1	1	1	3	2	1	3	2	1	1	1	1	1	1	1	1	1	3	1	4	17	3	5	3	3	4	3	3	5	29	3	3	3	4	4	4	4	3	4	3	4	4	4	47
520	2	2	2	3	1	1	2	3	1	1	4	5	4	4	4	4	4	4	4	5	5	4	51	3	4	4	3	3	4	4	4	29	4	4	4	3	3	4	4	3	4	3	3	5	4	48
521	2	2	1	2	1	1	2	4	1	1	4	4	4	4	4	4	4	4	4	4	4	4	48	5	5	5	5	5	5	5	5	40	4	3	3	4	3	4	4	4	4	3	4	5	4	49
522	1	1	2	2	1	1	2	1	1	1	4	4	4	4	3	3	4	4	4	4	4	4	46	3	3	3	3	3	3	3	3	24	3	3	3	3	3	4	4	3	3	3	4	5	4	45
523	2	1	2	1	1	1	2	1	2	1	5	5	5	5	5	5	5	5	5	5	5	5	60	4	4	5	4	4	5	5	5	36	4	4	4	3	3	4	4	3	3	3	4	5	4	48
524	2	2	2	3	1	1	2	2	1	2	4	5	5	5	3	4	3	4	4	4	5	5	51	3	3	3	1	2	2	4	3	21	4	4	4	3	4	4	4	3	3	3	4	4	4	48
525	2	2	2	2	1	1	2	3	1	1	4	4	4	5	5	4	4	4	4	4	4	4	50	4	4	4	4	4	4	4	4	32	3	3	3	4	4	4	4	3	3	3	3	4	4	45
526	2	2	2	2	2	3	2	1	1	1	4	5	4	4	4	4	2	4	4	4	4	4	47	3	4	4	3	4	3	3	3	27	4	3	3	4	3	4	3	3	4	3	3	5	4	46
527	2	2	2	3	1	1	2	1	1	2	4	5	5	4	5	4	3	4	4	4	4	5	51	2	3	5	3	5	5	3	3	29	3	3	3	3	3	3	3	3	3	3	4	5	4	43
528	2	4	1	1	2	3	2	3	1	1	3	3	3	3	2	3	3	4	3	3	4	3	37	5	3	5	5	5	3	3	3	32	3	3	3	4	3	3	4	4	3	3	3	5	4	45
529	2	2	1	1	1	2	2	1	2	2	3	4	4	3	3	3	3	4	3	3	4	3	40	4	3	4	3	3	5	3	4	29	4	4	4	4	4	4	4	4	4	4	4	4	4	52
530	2	3	1	1	1	2	1	2	1	2	4	4	4	4	4	4	4	4	4	4	4	4	48	4	3	3	3	3	3	3	3	25	3	3	3	3	3	4	3	3	3	3	4	5	4	44
531	2	2	1	2	3	3	2	1	1	2	4	4	4	4	3	3	4	3	3	3	3	4	42	5	5	5	5	5	4	5	5	39	3	3	3	3	3	3	3	3	3	3	3	5	4	42
532	2	2	1	3	2	1	2	1	1	1	4	5	4	4	4	4	4	4	4	5	3	4	49	3	3	3	2	2	5	3	3	24	4	3	3	3	3	4	4	3	4	3	4	5	4	47
533	2	2	2	2	1	1	1	1	1	2	4	4	4	4	4	4	4	4	4	4	4	4	48	3	4	4	5	3	5	3	4	31	4	3	3	4	3	3	4	3	3	3	3	5	4	45
534	2	2	2	2	1	1	2	1	3	2	3	4	4	4	3	4	4	4	3	3	4	4	44	4	4	4	4	4	4	4	4	32	3	3	3	3	3	3	3	3	3	3	3	5	4	42
535	2	2	2	2	1	1	2	3	1	1	4	4	4	4	4	4	4	4	4	4	4	4	48	3	4	4	3	3	3	4	4	28	3	3	3	4	3	3	3	3	3	3	3	5	4	43
536	2	3	1	2	2	3	1	3	1	1	4	3	3	3	3	4	3	3	3	3	3	3	38	5	5	5	4	4	4	4	4	35	4	3	3	4	3	3	3	3	3	3	3	5	4	44
537	1	1	2	2	1	1	2	2	2	2	4	4	3	3	4	4	3	4	4	3	3	4	43	3	5	3	3	3	3	4	3	27	4	4	4	4	3	4	4	4	4	4	4	5	4	52
538	2	2	3	2	1	2	1	2	1	1	4	5	5	4	3	3	4	4	4	4	4	4	48	3	4	4	4	3	5	4	4	31	3	3	3	3	4	4	4	3	4	3	3	4	4	45
539	2	3	1	2	2	3	2	1	1	2	5	5	5	4	5	5	4	4	4	4	4	4	53	3	4	4	2	3	4	3	3	26	3	3	3	3	4	3	4	3	4	3	3	4	4	44
540	2	2	1	2	2	2	1	3	2	2	4	4	4	4	4	4	4	4	4	4	4	4	48	4	3	3	2	3	4	3	2	24	4	4	4	3	3	4	4	4	4	4	4	5	4	51
541	2	2	1	2	2	3	1	2	2	1	5	5	5	5	5	5	5	5	5	5	5	5	60	5	5	5	5	5	5	4	3	37	3	3	3	4	3	3	3	3	3	3	4	5	4	44
542	2	2	1	2	2	2	2	3	2	2	5	5	5	5	5	5	5	5	5	5	5	5	60	4	4	4	4	4	4	4	4	32	4	4	4	3	4	4	4	4	3	4	4	4	4	50
543	2	2	2	2	1	1	2	1	2	2	4	4	3	4	4	4	3	3	4	4	3	4	44	3	4	3	3	3	4	3	3	26	4	3	3	3	3	4	4	4	4	4	4	5	4	49
544	2	2	1	1	1	1	2	1	2	2	5	5	5	5	5	5	5	4	4	4	4	4	55	5	5	5	5	5	5	5	5	40	4	4	4	4	4	4	4	4	4	4	4	4	4	52
545	2	3	1	2	3	3	1	3	2	2	4	3	3	4	4	4	3	3	3	3	3	3	40	3	4	4	2	2	2	4	2	23	3	3	4	4	3	4	4	4	4	3	4	5	4	49
546	2	2	2	2	1	1	2	3	2	1	4	4	4	4	3	4	4	4	4	4	4	4	47	3	3	4	3	4	3	3	4	27	4	4	4	4	3	4	3	3	4	4	4	5	4	50
547	2	4	1	1	1	3	1	2	3	2	5	5	5	2	5	5	5	5	3	4	4	3	51	4	4	4	4	3	4	4	4	31	4	4	4	3	4	4	4	3	4	3	4	4	4	49
548	2	3	1	2	2	3	2	1	2	1	4	4	3	3	3	3	4	3	3	3	3	4	40	4	4	4	2	4	3	4	4	29	4	4	4	3	3	4	4	4	3	3	3	5	4	48
549	2	2	2	1	1	1	2	1	2	1	4	4	4	4	4	4	4	4	4	4	4	4	48	4	4	4	4	4	4	4	4	32	4	3	4	3	4	4	4	4	3	3	4	4	4	48
550	2	2	1	2	1	1	2	2	2	2	3	2	2	3	3	3	4	3	3	3	3	3	35	3	4	3	5	4	4	4	4	31	4	3	3	3	3	4	4	3	3	3	4	5	4	46
551	2	1	2	2	1	1	1	2	1	2	4	4	4	5	4	4	4	4	4	4	4	3	48	4	4	4	4	5	4	4	4	33	3	3	3	3	3	3	3	3	3	3	3	5	4	42
552	2	3	1	2	3	3	2	3	2	1	4	4	4	4	4	4	4	4	4	4	4	4	48	4	4	4	4	4	4	4	4	32	4	4	4	3	4	4	4	4	4	4	4	4	4	51
553	2	2	1	2	1	2	2	3	1	1	4	4	4	4	4	4	4	4	4	4	4	4	48	3	4	4	3	5	4	4	4	31	4	4	4	3	3	3	4	4	4	3	4	5	4	49
554	1	1	2	2	1	1	1	2	1	1	5	5	5	5	5	5	5	5	5	5	5	5	60	5	5	5	5	5	5	5	3	38	3	3	3	3	3	3	3	3	3	3	3	5	4	42
555	2	2	1	2	1	1	2	2	2	2	3	3	3	3	3	3	3	3	3	3	3	3	36	5	4	4	3	4	5	5	4	34	3	3	4	3	3	4	4	4	3	3	4	5	4	47
556	2	1	2	2	1	1	2	1	1	2	4	4	4	4	4	4	4	4	4	4	4	4	48	4	3	4	4	3	5	3	3	29	3	3	3	4	3	4	4	3	3	3	4	5	4	46
557	2	1	2	2	1	1	2	1	2	1	4	4	4	3	4	3	4	4	4	3	4	4	45	3	3	3	2	2	4	3	3	23	3	3	4	3	3	4	4	4	4	3	3	5	4	47
558	2	2	2	2	1	1	2	4	1	1	5	5	5	5	5	5	5	5	5	5	5	5	60	5	5	5	5	5	5	5	5	40	3	3	3	4	3	3	3	3	3	3	3	5	4	43
559	2	1	2	2	1	1	2	1	1	2	4	4	4	4	4	4	4	4	4	4	4	4	48	4	4	4	2	3	2	2	2	23	3	3	3	3	3	4	3	3	3	3	3	5	4	43
560	2	1	2	2	1	1	2	1	1	2	4	4	4	3	4	4	4	4	3	4	4	4	46	4	4	4	1	4	3	3	3	26	3	3	3	3	3	3	3	3	3	3	3	5	4	42
561	2	1	2	2	1	1	2	1	1	2	5	5	5	5	5	4	5	5	5	4	5	5	58	4	3	3	2	3	3	3	3	24	4	4	3	3	3	4	4	4	4	4	4	5	4	50
562	1	3	1	2	1	3	2	2	1	1	4	4	4	4	4	4	4	4	4	4	4	4	48	3	3	3	3	3	4	3	3	25	4	4	4	3	3	4	3	3	4	3	4	5	4	48
563	2	1	2	2	1	1	1	1	1	1	4	4	4	4	4	4	4	4	3	4	4	4	47	5	5	5	5	5	5	4	4	38	4	3	3	3	4	4	3	3	3	3	4	4	4	45
564	2	2	1	2	2	1	2	1	1	1	4	4	4	4	4	4	4	4	4	4	4	4	48	4	4	4	2	2	4	4	4	28	3	3	3	4	3	4	3	3	4	3	4	5	4	46
565	2	2	2	2	2	1	2	4	1	2	3	3	3	3	3	3	3	3	3	3	3	4	37	4	3	4	3	4	3	3	3	27	3	3	3	3	3	3	3	3	3	3	3	5	4	42
566	2	2	1	2	1	2	2	1	1	2	4	4	4	4	4	4	4	4	4	4	4	4	48	3	4	3	3	3	3	3	3	25	3	3	3	4	3	4	4	3	3	3	4	5	4	46
567	2	2	2	3	1	1	2	4	2	2	3	4	4	5	5	4	3	3	3	3	3	3	43	3	3	3	2	2	2	3	3	21	3	3	3	3	3	3	3	3	3	3	3	5	4	42
568	2	2	2	3	1	1	2	1	1	2	4	4	4	4	4	4	4	4	4	4	4	3	47	4	4	3	5	4	4	4	4	32	4	4	4	3	3	3	4	3	3	3	4	5	4	47
569	1	1	2	2	1	1	1	1	2	2	4	4	4	4	4	4	4	4	4	4	4	4	48	3	3	3	3	3	3	3	3	24	4	3	3	3	3	4	3	3	3	3	4	5	4	45
570	2	2	2	2	1	1	1	1	1	1	5	5	5	5	5	5	5	5	5	5	5	5	60	5	5	5	5	5	5	5	5	40	4	3	4	3	3	4	4	3	3	4	4	5	4	48
571	2	2	1	2	2	3	1	4	2	2	3	3	3	4	4	4	2	4	4	4	4	5	44	2	3	5	5	1	5	5	5	31	4	4	4	3	4	4	4	3	3	4	4	4	4	49
572	1	2	2	3	1	1	2	3	1	2	5	5	4	5	4	4	4	4	4	4	4	4	51	3	3	3	5	2	5	2	5	28	4	3	3	3	3	4	4	4	4	3	4	5	4	48
573	2	1	2	2	1	1	2	3	1	2	4	4	4	5	5	4	3	3	4	4	3	3	46	3	3	3	3	3	3	3	3	24	4	3	3	3	3	4	4	4	4	4	4	5	4	49
574	2	2	2	2	1	1	2	1	2	1	3	4	4	4	3	3	3	3	3	4	3	3	40	5	5	5	3	3	3	3	4	31	4	3	3	3	3	3	3	3	3	3	3	5	4	43
575	2	2	2	2	1	1	1	1	1	1	5	5	5	5	5	5	5	5	5	5	5	5	60	5	5	5	5	4	5	3	5	39	4	4	4	3	4	4	4	4	3	4	4	4	4	50
576	1	1	2	2	1	1	2	1	2	2	4	4	4	5	5	5	3	4	4	5	5	5	53	3	5	5	4	5	5	5	5	37	4	4	4	3	4	4	4	4	4	4	4	4	4	51
